# Supplementary material for: Changing fluxes of carbon and other solutes from the Mekong River
Source: PubMed Central journal article supplement (PMC4629185; doi:10.1038/srep16005), 2015-11-02
Supplement: srep16005-s1.pdf [file srep16005-s1.pdf]

## **Changing carbon of the Mekong River**

Siyue Li<sup>1,2\*</sup>, Richard T. Bush<sup>1</sup>

1. Southern Cross GeoScience, Southern Cross University, New South Wales, 2480,  
Australia

2. Key Laboratory of Reservoir Aquatic Environment, Chongqing Institute of Green and  
Intelligent Technology, Chinese Academy of Sciences, Chongqing 400714, China

### **Supplementary materials**

**Figs. S1-S9**

**Tables. S1-S5**

**References.**

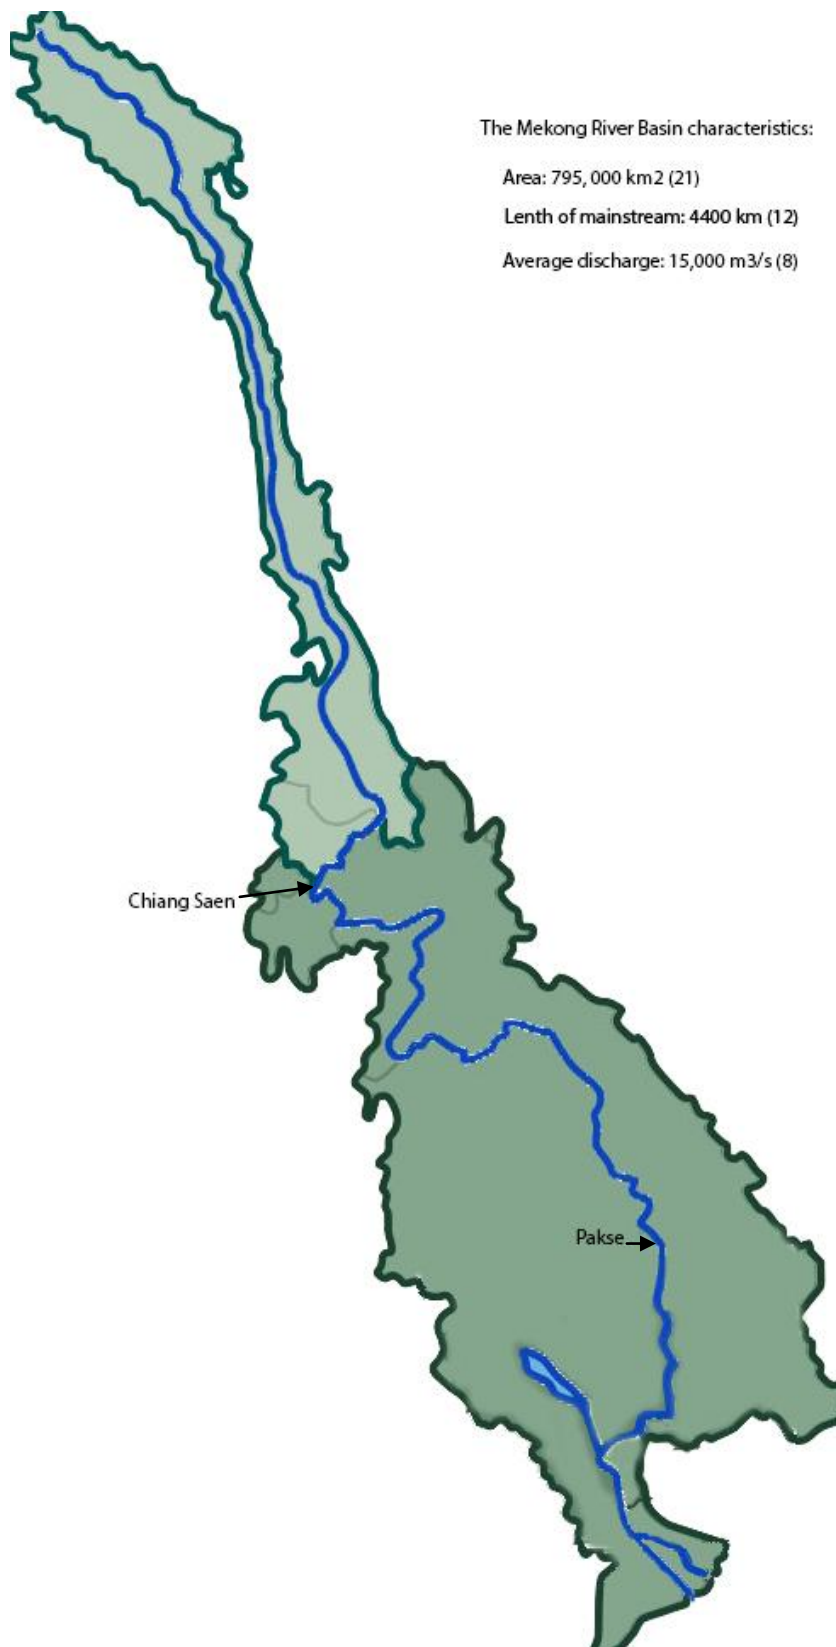

**Fig. S1.** Lower Mekong River showing main-channel stations (Chiang Saen represents the Upper Mekong catchment, while Pakse, the most downstream station with available water discharge, thus represents the whole basin) (This map is created using Photoshop CC 2014).

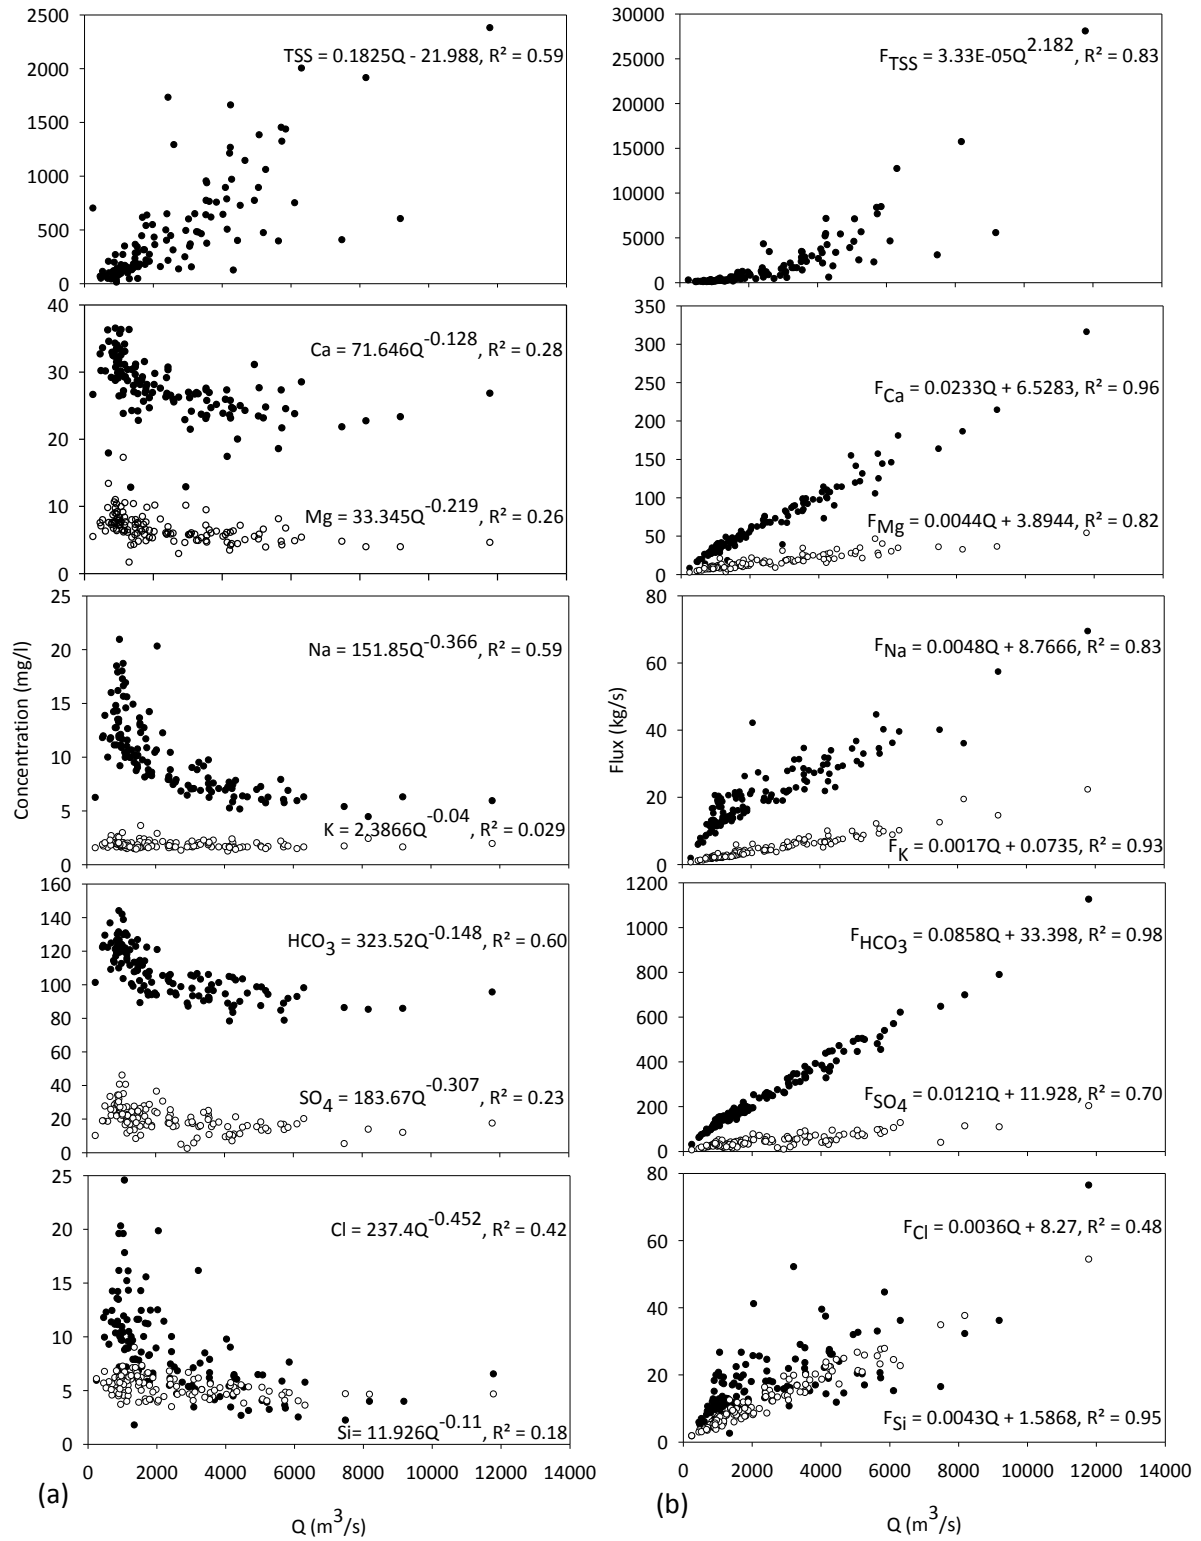

**Fig. S2.** Scatter plots between instantaneous water discharge and concentrations (a) and fluxes (b) in the station Chiang Saen of Mekong River.

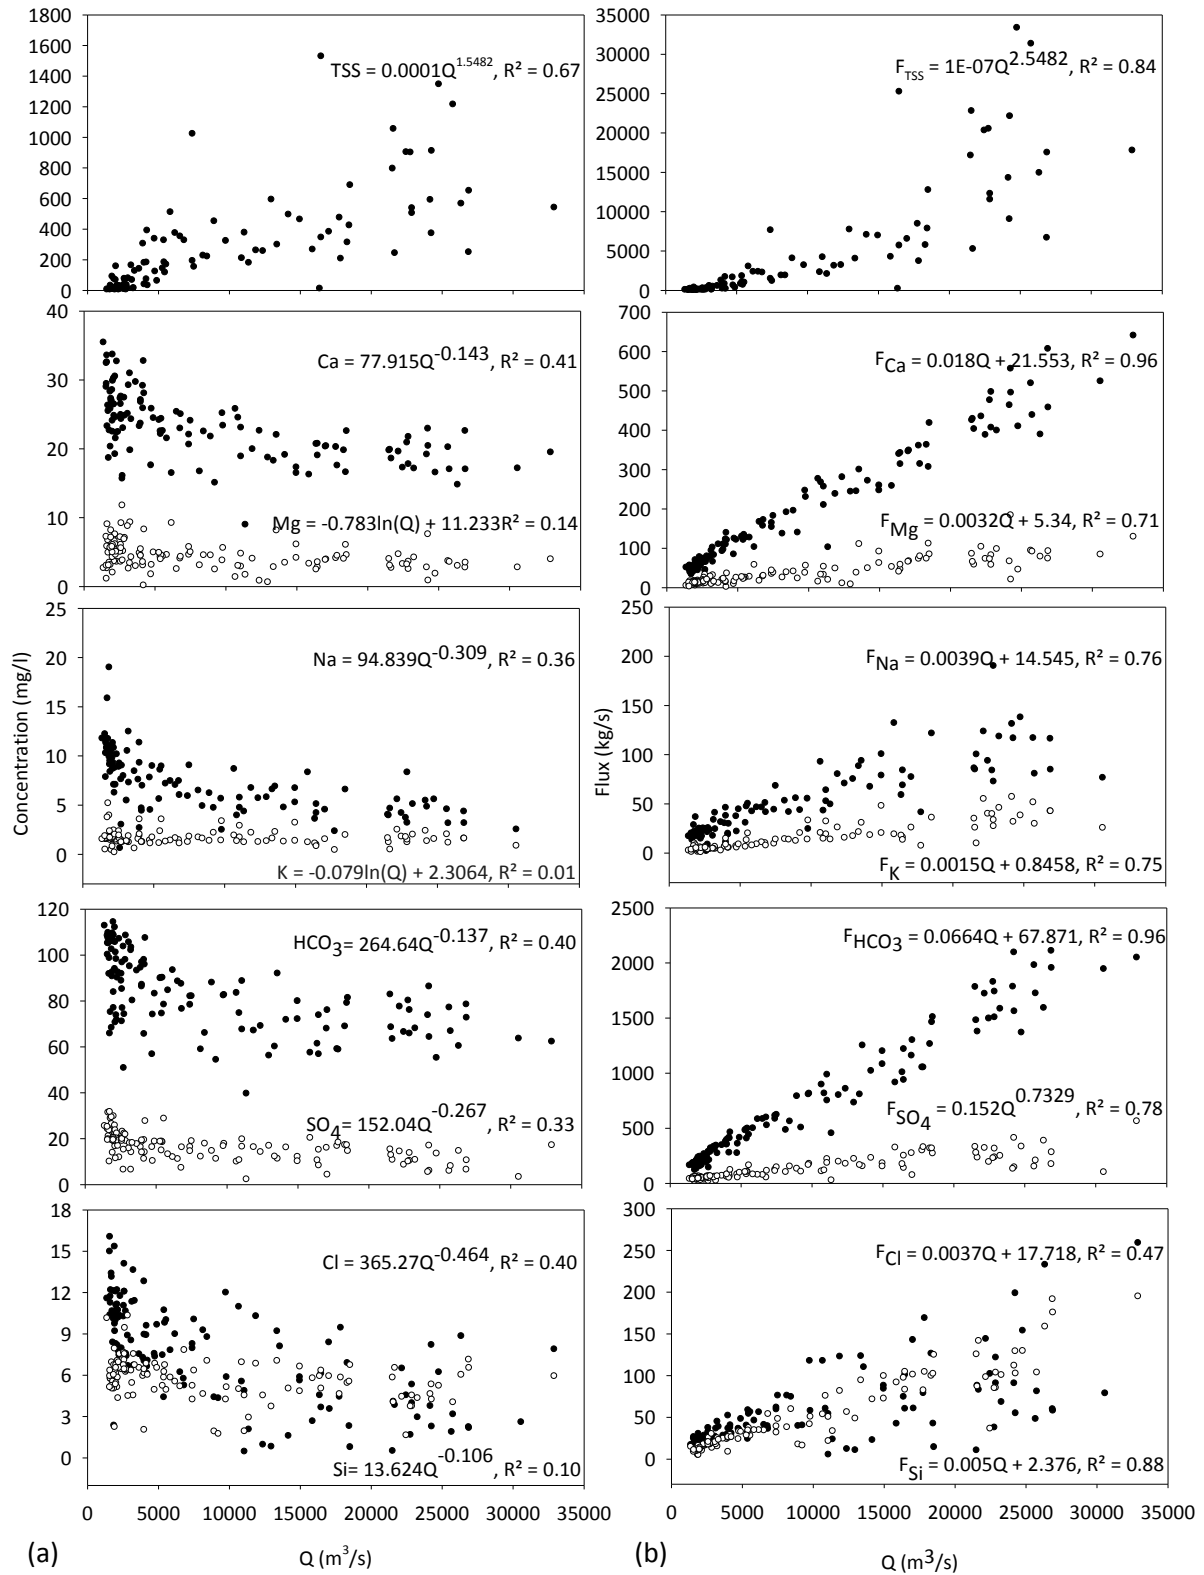

**Fig. S3.** Scatter plots between instantaneous water discharge and concentrations (a) and fluxes (b) in the station Pakse of Mekong River.

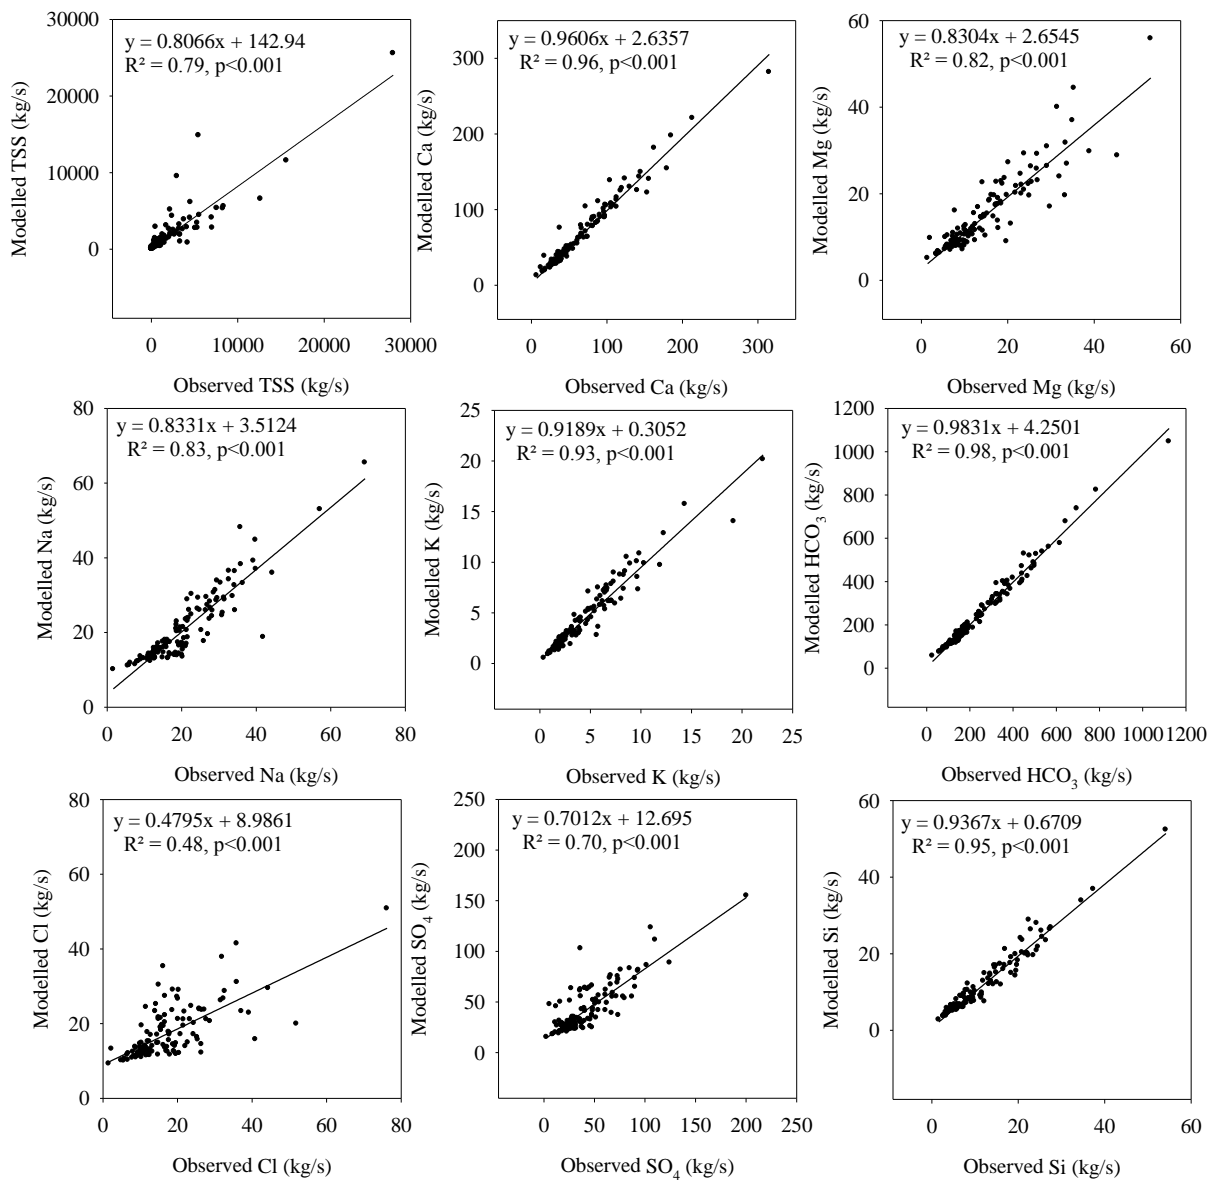

**Fig. S4.** Validation of modelling approach (comparison of instantaneous observed fluxes and modelled values, data are from station Chiang Saen).

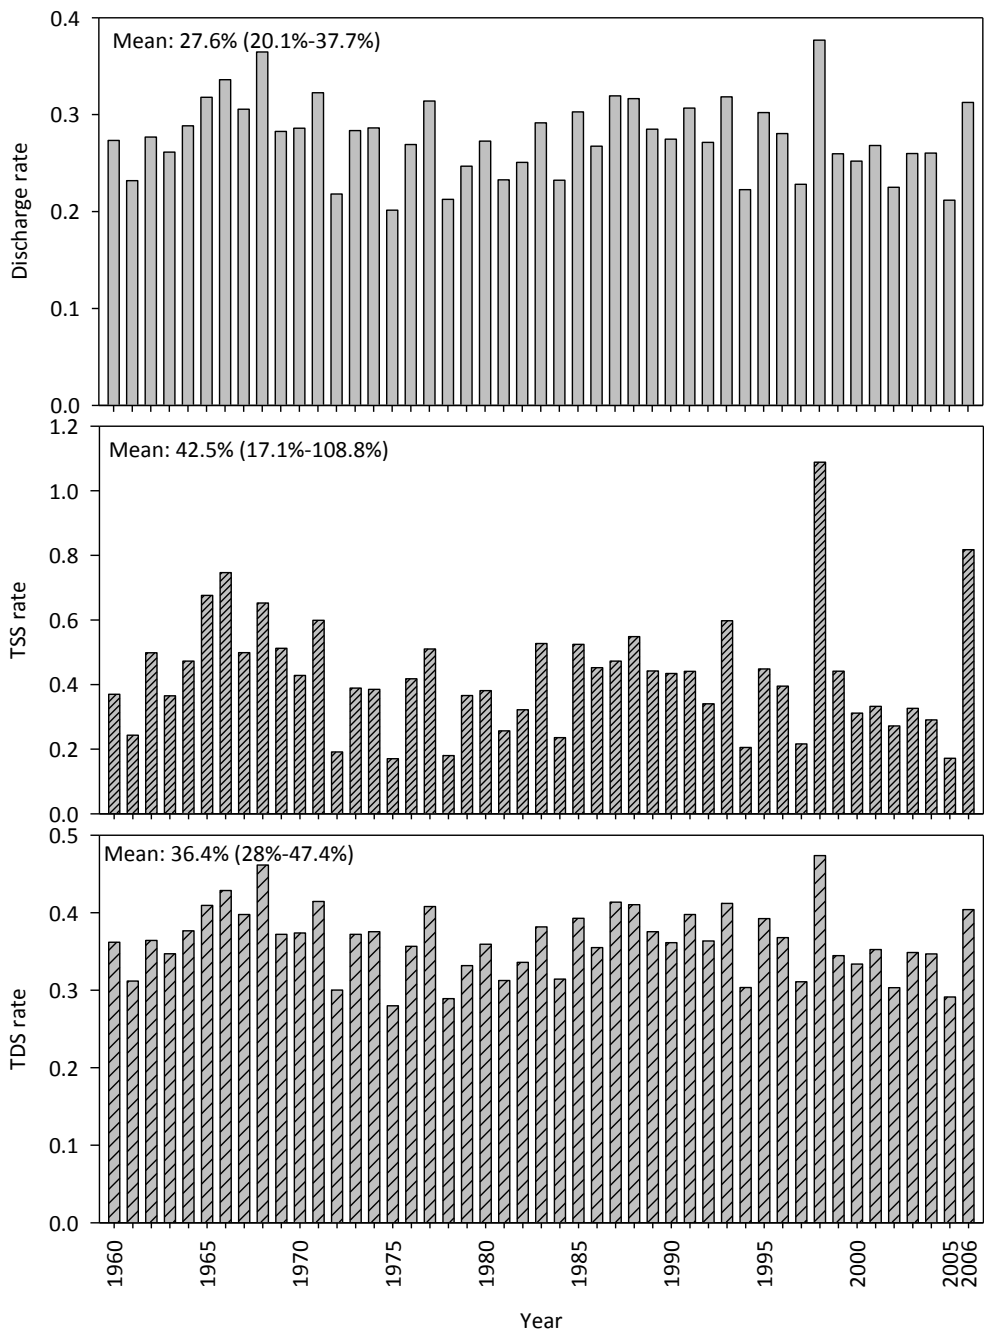

**Fig. S5.** The contributions of water discharge, TSS and TDS from upper catchment to the Mekong River (reflected by the ratio of the fluxes from Chiang Saen to Pakse).

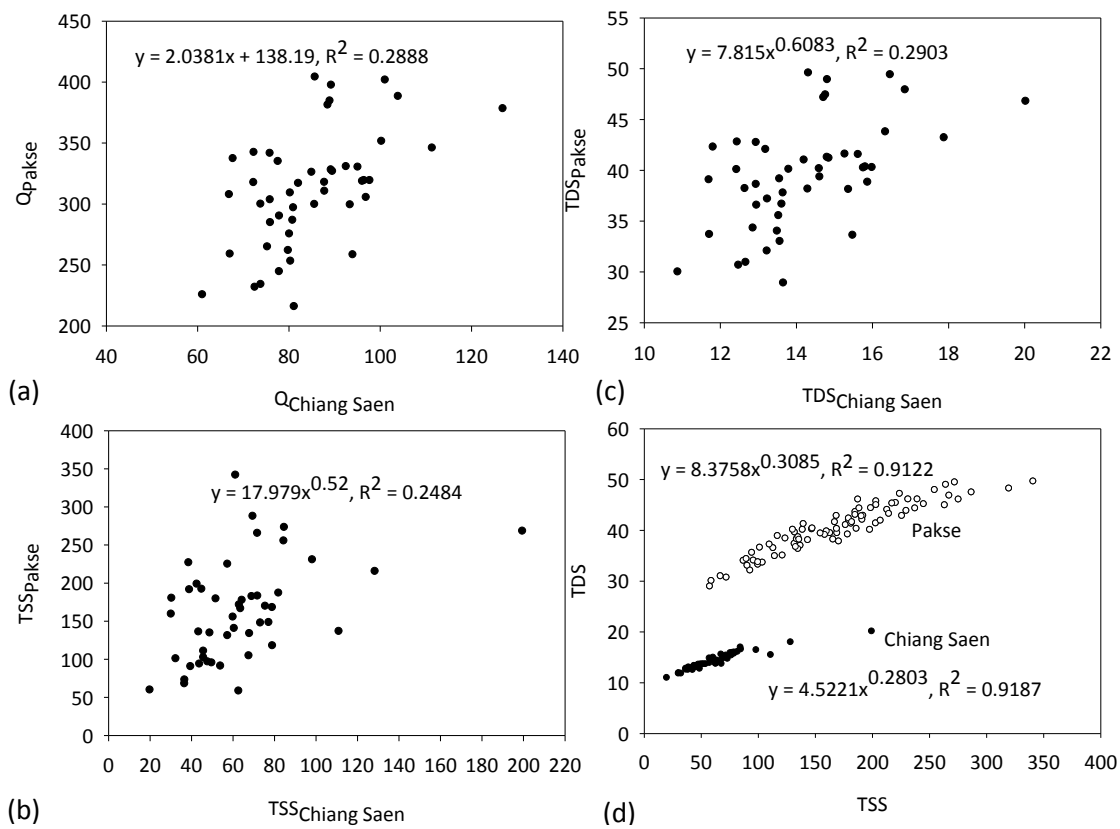

**Fig. S6.** The relationships between water discharge (a), TSS (b) and TDS (c) loads, as well as between TDS and TSS (d) at the both stations (Chiang Saen and Pakse) (unit in  $\text{km}^3/\text{y}$  for water discharge,  $\text{Mt}/\text{y}$  for TSS and TDS loads).

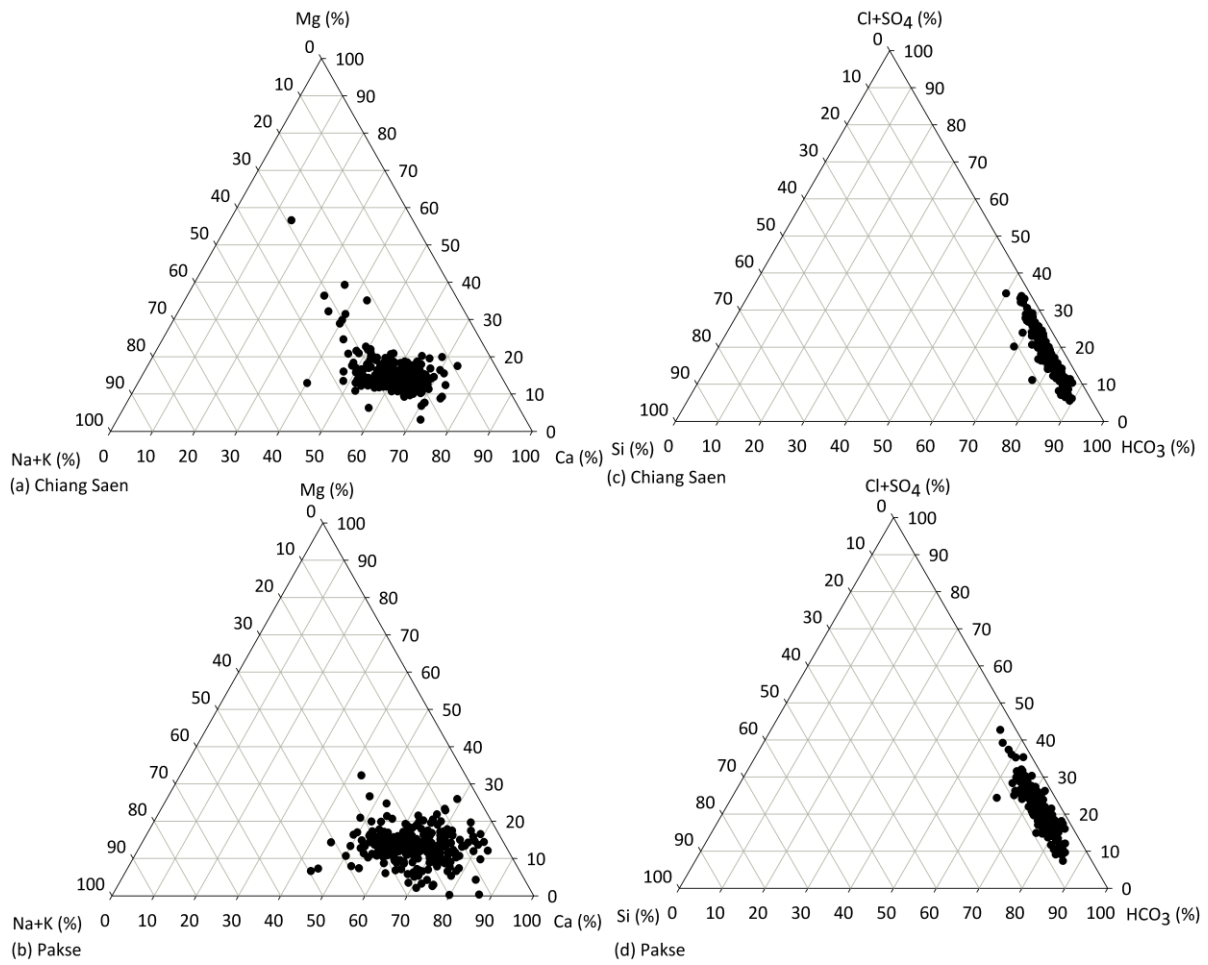

**Fig. S7.** Ternary plot showing relative abundance of cations (a and b) and anions (c and d) (unit in mg/L).



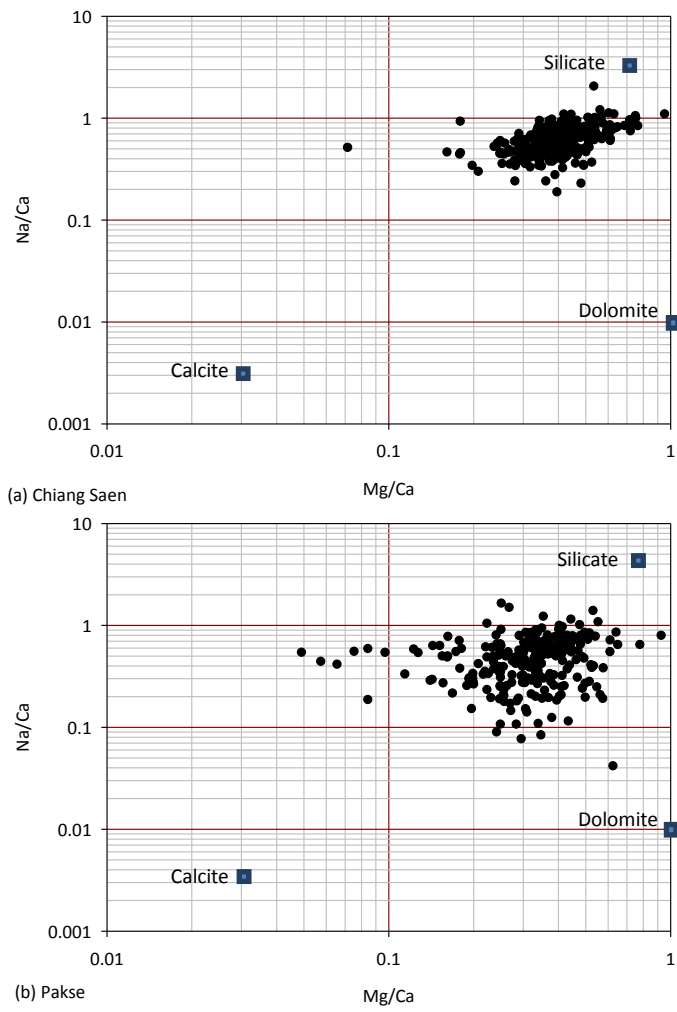

**Fig. S8.** Scatter plots between Na/Ca and Mg/Ca (molar ratio) in the stations (a-Chiang Saen, b-Pakse) of the LMR (End-members of rocks are from Gailardet et al., 1999 and Li et al., 2014).

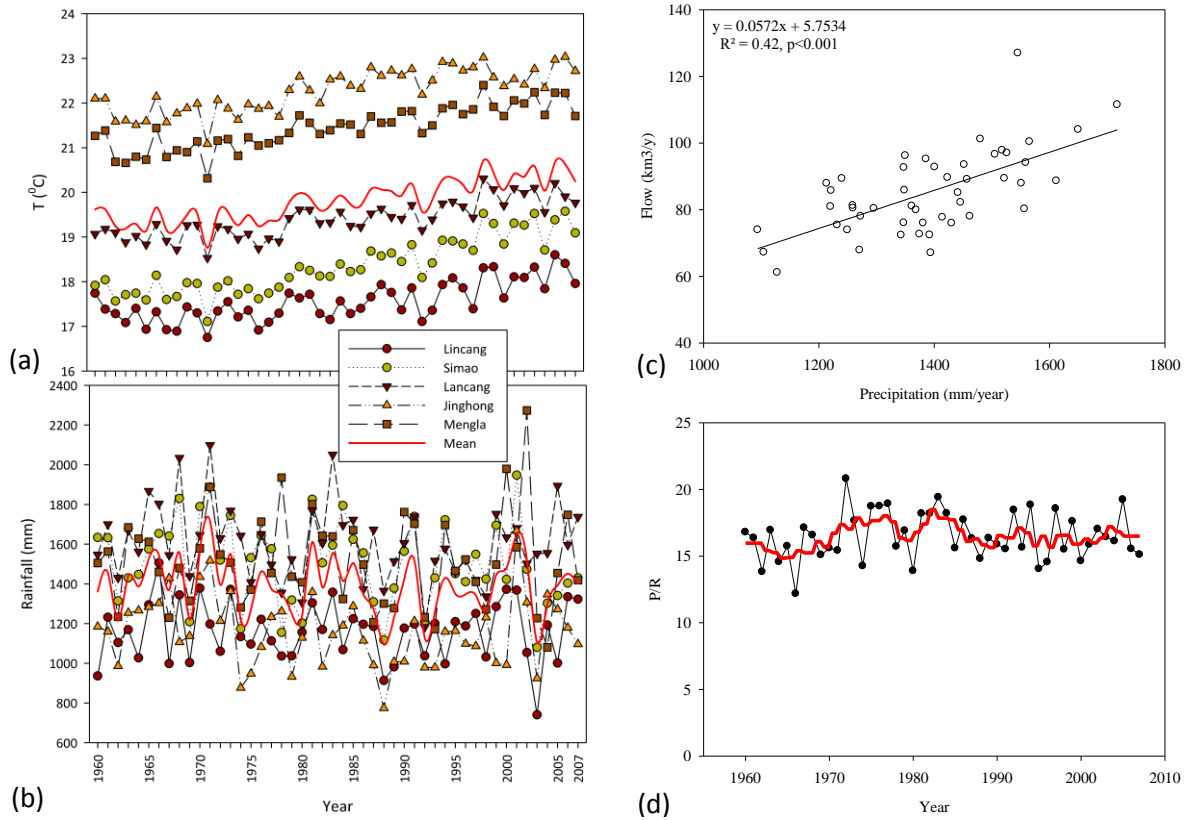

**Fig. S9.** Temperature (a) and rainfall (b) in five stations (Lincang, Simao, Lancang, Jinghong and Mengla) of upper Mekong River over 1960-2010. Mean temperature variations as year:  $T = 0.0284\text{Year} - 36.447$ ,  $R^2 = 0.72$ ,  $p < 0.01$ . (c) Relationships between river discharge at Chiang Saen and annual mean precipitation in the upper basin, (d) Changes in the ratio of precipitation (P) to runoff (R) (P/R; unit in mm for precipitation, while  $\text{km}^3/\text{year}$  for runoff) in the upper basin (red line means smoothing analysis that averages the values at neighboring points).

**Table S1.** Main channel stations of the LMR included in this study

| Stations                 | Country  | Location |           | Distance from the River mouth<br>km | Drainage area<br>10 <sup>3</sup> km <sup>2</sup> | Pre-regulated period<br>1923-1991 | Regulated period<br>1992-2007 | Total |
|--------------------------|----------|----------|-----------|-------------------------------------|--------------------------------------------------|-----------------------------------|-------------------------------|-------|
|                          |          | latitude | longitude |                                     |                                                  |                                   |                               |       |
| Chiang Saen <sup>a</sup> | Thailand | 20.16.4  | 100.05.0  | 2363                                | 189                                              |                                   |                               |       |
|                          |          |          |           |                                     |                                                  | 85.8                              | 83.9                          | 85.2  |
|                          |          |          |           |                                     |                                                  | 64.7                              | 61.1                          | 63.5  |
|                          |          |          |           |                                     |                                                  | 14.3                              | 14.1                          | 14.2  |
| Pakse <sup>b</sup>       | Lao PDR  | 17.07    | 105.48.0  | 869                                 | 545                                              |                                   |                               |       |
|                          |          |          |           |                                     |                                                  | 320.9                             | 314.1                         | 319.7 |
|                          |          |          |           |                                     |                                                  | 171.4                             | 167.4                         | 170.7 |
|                          |          |          |           |                                     |                                                  | 40.5                              | 39.7                          | 40.4  |

<sup>a</sup>data are from the time period of 1960-2007, <sup>b</sup>data are from the time period of 1923-2006.

**Table S2.** Comparison of annual mean concentrations in the LMR (unit in mg/L).

|                           |      | TSS     | Ca    | Mg   | Na    | K    | HCO <sub>3</sub> | Cl    | SO <sub>4</sub> | Si   | TDS    |
|---------------------------|------|---------|-------|------|-------|------|------------------|-------|-----------------|------|--------|
| <b><i>Chiang Saen</i></b> |      |         |       |      |       |      |                  |       |                 |      |        |
| Observed mean             | Mean | 317.53  | 27.76 | 7.14 | 9.96  | 1.86 | 108.08           | 9.41  | 20.58           | 5.56 | 188.51 |
|                           | Max. | 727.83  | 31.22 | 9.34 | 11.34 | 2.36 | 126.18           | 12.33 | 31.01           | 6.9  | 221.59 |
|                           | Min. | 63.24   | 23.98 | 4.7  | 8.24  | 1.48 | 93.62            | 7.42  | 8.99            | 4.7  | 167.45 |
|                           | S.D. | 174.94  | 1.87  | 1.16 | 0.8   | 0.26 | 7.26             | 1.32  | 5.32            | 0.51 | 11.85  |
| Observed Q-weight mean    | Mean | 687.91  | 25.81 | 5.98 | 8.33  | 1.75 | 99.93            | 6.9   | 17.01           | 5    | 170.7  |
|                           | Max. | 1320.66 | 28.76 | 6.82 | 9.25  | 1.96 | 108.66           | 8.86  | 21.51           | 5.52 | 186.78 |
|                           | Min. | 293.8   | 23.29 | 4.68 | 7.69  | 1.6  | 93.45            | 5.65  | 13.52           | 4.32 | 161.16 |
|                           | S.D. | 350.03  | 1.77  | 0.63 | 0.53  | 0.13 | 4.84             | 1.03  | 2.52            | 0.33 | 8.39   |
| Q-weight mean (predicted) | Mean | 718.83  | 25.3  | 5.65 | 7.93  | 1.73 | 97.16            | 6.26  | 15.36           | 4.87 | 164.25 |
|                           | Max. | 1573    | 26.9  | 6.25 | 9.31  | 1.74 | 104.26           | 7.58  | 17.62           | 5.14 | 178.8  |
|                           | Min. | 329.51  | 23.55 | 5.01 | 6.54  | 1.72 | 89.49            | 4.97  | 13.04           | 4.58 | 148.9  |
|                           | S.D. | 208.99  | 0.6   | 0.22 | 0.5   | 0    | 2.64             | 0.48  | 0.83            | 0.1  | 5.38   |
| <b><i>Pakse</i></b>       |      |         |       |      |       |      |                  |       |                 |      |        |
| Observed Mean             | Mean | 171.08  | 22.93 | 4.62 | 6.59  | 1.54 | 82.61            | 8.08  | 15.68           | 5.84 | 149.21 |
|                           | Max. | 509.6   | 28.06 | 5.91 | 9.28  | 3.05 | 94.91            | 12.3  | 29.4            | 7.46 | 164.14 |
|                           | Min. | 64.92   | 17.5  | 3.01 | 2.48  | 0.63 | 68.49            | 4.34  | 6.25            | 4.14 | 131.54 |
|                           | S.D. | 107.25  | 2.15  | 0.8  | 1.89  | 0.5  | 6.15             | 2     | 4.26            | 0.85 | 8.41   |
| Observed Q-weight mean    | Mean | 478.45  | 20.56 | 3.78 | 5.13  | 1.45 | 74.44            | 5.47  | 12.84           | 5.28 | 129.24 |
|                           | Max. | 870.01  | 23.88 | 5.91 | 6.07  | 2.8  | 84.5             | 8.99  | 17.7            | 7    | 142.48 |
|                           | Min. | 175.15  | 19.08 | 1.98 | 2.14  | 0.51 | 63.9             | 3.56  | 5.49            | 3.49 | 119.39 |
|                           | S.D. | 205.51  | 1.33  | 1.01 | 1.18  | 0.56 | 5.73             | 1.51  | 3.58            | 1.05 | 6.82   |
| Q-weight mean (predicted) | Mean | 519.24  | 19.74 | 3.68 | 4.98  | 1.46 | 71.01            | 4.52  | 11.87           | 4.92 | 122.16 |
|                           | Max. | 844.84  | 21.01 | 4.02 | 5.69  | 1.47 | 75.37            | 5.5   | 13.32           | 5.15 | 131.53 |
|                           | Min. | 262.68  | 18.89 | 3.43 | 4.54  | 1.45 | 68.07            | 3.94  | 10.94           | 4.76 | 116.02 |
|                           | S.D. | 123.27  | 0.46  | 0.13 | 0.25  | 0.01 | 1.58             | 0.34  | 0.51            | 0.09 | 3.36   |

Observed mean is measured variables, Observed Q-weight mean is measured variables with water discharge weight, while Q-weight mean (predicted) is concentration derived from models.

**Table S3.** Statistics of dissolved and particulate material fluxes in the LMR.

|                    | Discharge          | Flux (Mt/y)      |                 |                 |                 |                 |                 |                 |                |                   |                   |                 |                 |                  |                  |                 |                 |                  |  |
|--------------------|--------------------|------------------|-----------------|-----------------|-----------------|-----------------|-----------------|-----------------|----------------|-------------------|-------------------|-----------------|-----------------|------------------|------------------|-----------------|-----------------|------------------|--|
|                    | km <sup>3</sup> /y | TSS <sub>1</sub> | Ca <sub>1</sub> | Ca <sub>2</sub> | Mg <sub>1</sub> | Mg <sub>2</sub> | Na <sub>1</sub> | Na <sub>2</sub> | K <sub>2</sub> | HCO <sub>31</sub> | HCO <sub>32</sub> | Cl <sub>1</sub> | Cl <sub>2</sub> | SO <sub>41</sub> | SO <sub>42</sub> | Si <sub>1</sub> | Si <sub>2</sub> | TDS <sub>2</sub> |  |
| <i>Chiang Saen</i> |                    |                  |                 |                 |                 |                 |                 |                 |                |                   |                   |                 |                 |                  |                  |                 |                 |                  |  |
| Mean               | 85.21              | 63.52            | 2.15            | 2.19            | 0.48            | 0.50            | 0.67            | 0.69            | 0.15           | 8.25              | 8.36              | 0.53            | 0.53            | 1.30             | 1.41             | 0.41            | 0.42            | 14.24            |  |
| Max.               | 126.98             | 199.74           | 2.99            | 3.17            | 0.64            | 0.68            | 0.83            | 0.89            | 0.22           | 11.36             | 11.95             | 0.63            | 0.63            | 1.66             | 1.91             | 0.58            | 0.60            | 20.04            |  |
| Min.               | 61.11              | 20.14            | 1.64            | 1.63            | 0.38            | 0.39            | 0.57            | 0.57            | 0.11           | 6.37              | 6.30              | 0.46            | 0.47            | 1.08             | 1.12             | 0.31            | 0.31            | 10.89            |  |
| S.D.               | 12.40              | 29.25            | 0.26            | 0.29            | 0.05            | 0.05            | 0.05            | 0.06            | 0.02           | 0.97              | 1.06              | 0.04            | 0.04            | 0.12             | 0.15             | 0.05            | 0.05            | 1.73             |  |
| <i>Pakse</i>       |                    |                  |                 |                 |                 |                 |                 |                 |                |                   |                   |                 |                 |                  |                  |                 |                 |                  |  |
| Mean               | 319.69             | 170.69           | 6.29            | 6.43            | 1.17            | 1.19            | 1.58            | 1.71            | 0.47           | 22.63             | 23.37             | 1.43            | 1.74            | 3.77             | 3.77             | 1.57            | 1.67            | 40.35            |  |
| Max.               | 403.85             | 341.19           | 7.68            | 7.95            | 1.41            | 1.46            | 1.86            | 2.03            | 0.59           | 27.65             | 28.96             | 1.63            | 2.05            | 4.49             | 4.48             | 1.93            | 2.09            | 49.55            |  |
| Min.               | 215.55             | 57.84            | 4.53            | 4.56            | 0.87            | 0.86            | 1.23            | 1.30            | 0.32           | 16.25             | 16.45             | 1.19            | 1.36            | 2.87             | 2.87             | 1.11            | 1.15            | 28.86            |  |
| S.D.               | 43.76              | 60.31            | 0.73            | 0.79            | 0.12            | 0.14            | 0.15            | 0.17            | 0.06           | 2.65              | 2.91              | 0.10            | 0.16            | 0.37             | 0.37             | 0.19            | 0.22            | 4.82             |  |

<sup>1</sup>represents model1

<sup>2</sup>represents model 2

**Table S4.** Comparison of global watershed physical characteristics, concentrations, fluxes and yields of DIC and major solutes.

**(a) Lithology (data are from Amiotte Suchet et al., 2003)**

|       |                      | Area<br>10 <sup>3</sup> km <sup>2</sup> | Discharge<br>km <sup>3</sup> /y | Runoff<br>mm | Sands and sandstone<br>% | Shales<br>% | Carbonate<br>% | Shield<br>% | Acid Volcanic<br>% | Basalts<br>% |
|-------|----------------------|-----------------------------------------|---------------------------------|--------------|--------------------------|-------------|----------------|-------------|--------------------|--------------|
| 1(a)  | Amazon (upper)       | 5830                                    | 6223                            | 1067.4       | 16.7                     | 51          | 3.9            | 27          | 1.9                | 0            |
| 1(b)  | Amazon (lower)       | 5830                                    | 6223                            | 1067.4       | 16.7                     | 51          | 3.9            | 27          | 1.9                | 0            |
| 2     | Amur                 | 1870                                    | 407                             | 217.6        | 11.9                     | 28          | 0              | 54          | 0                  | 6.5          |
| 3     | Brahmaputra          | 583                                     | 612                             |              |                          |             |                |             |                    |              |
| 4     | Chao Phraya          | 160                                     | 30.4                            | 190          |                          |             |                |             |                    |              |
| 5     | Colorado             | 670                                     | 28                              | 41.8         | 55.6                     | 0           | 0              | 10          | 34                 | 0            |
| 6     | Columbia             | 620                                     | 269                             | 433.9        | 1.4                      | 13          | 0              | 44          | 33.4               | 8.4          |
| 7     | Danube               | 740                                     | 140                             | 189.2        | 3.3                      | 67          | 14.5           | 16          | 0                  | 0            |
| 8     | Don                  | 390                                     | 31                              | 79.5         | 0                        | 94          | 5.9            | 0           | 0                  | 0            |
| 9     | Fraser               | 240                                     | 104                             | 433.3        | 0                        | 69          | 0              | 22          | 9.5                | 0            |
| 10    | Ganges               | 1060                                    | 459                             |              |                          |             |                |             |                    |              |
| 11(a) | Ganges-Brahmaputra   | 1643                                    | 1071                            | 651.9        | 15.4                     | 32          | 33.8           | 18          | 0                  | 1.4          |
| 11(b) | Ganges-Brahmaputra   | 1643                                    | 1071                            |              |                          |             |                |             |                    |              |
| 12    | Godavari             | 300                                     | 147                             | 490          | 3.9                      | 0           | 0              | 62          | 0                  | 34.5         |
| 13    | Yenisei              | 2440                                    | 665                             | 272.5        | 6.4                      | 12          | 6.9            | 38          | 0                  | 36           |
| 14    | Indigirka            | 340                                     | 54                              | 158.8        | 39.9                     | 60          | 0              | 0           | 0                  | 0            |
| 15    | Indus                | 880                                     | 251                             | 285.2        | 16.8                     | 24          | 26             | 33          | 0                  | 0            |
| 16    | Irrawaddy            | 400                                     | 459                             | 1147.5       | 30.6                     | 14          | 44             | 11          | 0                  | 0            |
| 17    | Kolyma               | 590                                     | 122                             | 206.8        | 72.3                     | 28          | 0              | 0           | 0                  | 0            |
| 18    | Lena                 | 2320                                    | 393                             | 169.4        | 10.8                     | 39          | 11.2           | 34          | 0                  | 5.1          |
| 19    | Limpopo              | 310                                     | 27                              | 87.1         | 25                       | 0           | 14.2           | 39          | 0                  | 21.6         |
| 20    | Mackenzie            | 1470                                    | 260                             | 176.9        | 0                        | 54          | 20.6           | 26          | 0                  | 0            |
| 21    | Magdalena            | 260                                     | 313                             | 1203.8       | 23.8                     | 29          | 4.8            | 24          | 19.1               | 0            |
| 22(a) | Mekong (Chiang Saen) | 189                                     | 85.2                            | 450.8        |                          |             |                |             |                    |              |

|             |                  |        |       |       |      |      |      |      |      |      |
|-------------|------------------|--------|-------|-------|------|------|------|------|------|------|
| 22(b)       | Mekong (Pakse)   | 545    | 319.7 | 586.6 | 8.4  | 43   | 21.4 | 18   | 2.9  | 5.8  |
| 22(c)       | Mekong           | 820    | 623   | 759.8 | 8.4  | 43   | 21.4 | 18   | 2.9  | 5.8  |
| 23          | Mississippi      | 3130   | 570   | 182.1 | 25.3 | 48   | 18.1 | 8.7  | 0.3  | 0    |
| 24          | Murray Darling   | 1110   | 40    | 36    | 0.9  | 72   | 0    | 21   | 2.7  | 2.9  |
| 25          | Niger            | 1500   | 166   | 110.7 | 57.8 | 0    | 6.3  | 35   | 0    | 0.8  |
| 26          | Nile             | 1840   | 125   | 67.9  | 31.9 | 0    | 2.5  | 45   | 0    | 20.4 |
| 27          | Ob               | 3010   | 477   | 158.5 | 19.8 | 72   | 2.7  | 2.7  | 0    | 3    |
| 28          | Orange           | 660    | 26    | 39.4  | 68.8 | 0    | 9.8  | 17   | 0    | 4.8  |
| 29          | Orinoco          | 960    | 759   | 790.6 | 17.7 | 47   | 1.3  | 30   | 0    | 3.8  |
| 30          | Parana           | 2840   | 666   | 234.5 | 27.3 | 44   | 1.2  | 15   | 0.8  | 12.3 |
| 31          | Red              | 120    | 123   | 1025  |      |      |      |      |      |      |
| 32          | Salween          | 325    | 211   | 649.2 |      |      |      |      |      |      |
| 33          | Sao Francisco    | 590    | 119   | 201.7 | 14   | 8    | 39.8 | 38   | 0    | 0    |
| 34          | Senegal          | 360    | 15    | 41.7  | 64.5 | 3.2  | 0    | 29   | 0    | 3.3  |
| 35          | Severnaia Dvina  | 300    | 97    | 323.3 | 10.9 | 78   | 10.8 | 0    | 0    | 0    |
| 36          | Xijiang          | 352    | 230   | 653.4 | 0    | 0    | 82.4 | 18   | 0    | 0    |
| 37          | St. Lawrence     | 870    | 360   | 413.8 | 0    | 6.1  | 24.9 | 69   | 0    | 0    |
| 38          | Tigris-Euphrates | 930    | 156   | 167.7 | 17.2 | 26   | 42.5 | 2.2  | 11.3 | 1    |
| 39          | Yana             | 210    | 25    | 119   | 50.6 | 49   | 0    | 0    | 0    | 0    |
| 40          | Yangtze          | 1740   | 908   | 521.8 | 13.9 | 7.9  | 44   | 34   | 0    | 0    |
| 41          | Yellow           | 750    | 33    | 44    | 27.6 | 5.9  | 7.6  | 59   | 0    | 0    |
| 42          | Yukon            | 780    | 169   | 216.7 | 0    | 85   | 0    | 15   | 0    | 0    |
| 43          | Zaire            | 3600   | 1298  | 360.6 | 46.6 | 0    | 10.1 | 42   | 0    | 1.4  |
| 44          | Zambesi          | 1310   | 109   | 83.2  | 45.9 | 0    | 13.6 | 39   | 0    | 1.8  |
| World total |                  | 148170 | 37400 | 252.4 | 26.3 | 25.3 | 13.4 | 27.6 | 2.3  | 5.1  |

**(b) Land cover composition (data are mainly from Ludwig et al., 1996 and [http://multimedia.wri.org/watersheds\\_2003/](http://multimedia.wri.org/watersheds_2003/))**

|       | FTSS     | Elev. | Slope  | SoilH | APPT | AT    | Veg C | SoilC | NPP   | PopD  | FDOC     | FPOC     | POC%  | DOC  | POC  | Land cover (%) |                          |            |         |          |                    |       |  |
|-------|----------|-------|--------|-------|------|-------|-------|-------|-------|-------|----------|----------|-------|------|------|----------------|--------------------------|------------|---------|----------|--------------------|-------|--|
|       | t/km2/yr | m     | radian | cm    | mm   | OC    | kg/m2 | kg/m3 | kg/m2 | h/km2 | t/km2/yr | t/km2/yr | % tss |      |      | Forest         | Grass, Savanna And Shrub | Vegetation | Wetland | Cropland | Irrigated Cropland | Urban |  |
|       |          |       |        |       |      |       |       |       |       |       |          |          |       |      |      |                |                          |            |         |          |                    |       |  |
|       |          |       |        |       |      |       |       |       |       |       |          |          |       |      |      |                |                          |            |         |          |                    |       |  |
| 1(a)  |          |       |        |       |      |       |       |       |       |       |          |          |       |      |      |                |                          |            |         |          |                    |       |  |
| 1(b)  | 190      | 455   | 0.0434 | 226   | 2084 | 24.4  | 11.7  | 13.3  | 0.669 | 4     | 4.461    | 2.826    | 6.09  | 4.46 | 2.83 | 73.4           | 10.2                     | 83.6       | 8.3     | 14.1     | 0.1                | 0.6   |  |
| 2     | 28       | 571   | 0.0699 | 137   | 479  | -1.6  | 6.9   | 12.7  | 0.472 | 33    |          |          |       |      |      | 53.8           | 8.8                      | 62.6       | 4.4     | 18.4     | 0.8                | 2.6   |  |
| 3     |          |       |        |       |      |       |       |       |       | 182   |          |          |       |      |      | 18.5           | 44.7                     | 63.2       | 20.7    | 29.4     | 3.7                | 2.4   |  |
| 4     |          |       |        |       |      |       |       |       |       | 119   |          |          |       |      |      | 35.4           | 11.1                     | 46.5       | 8.4     | 44.7     | 12.5               | 9.2   |  |
| 5     | 190      | 1505  | 0.1718 | 176   | 283  | 11.7  | 4.2   | 6.6   | 0.322 | 9     |          |          |       |      |      | 17             | 74.9                     | 91.9       | 2.5     | 0.9      | 2                  | 6.9   |  |
| 6     | 22       | 1336  | 0.2197 | 232   | 482  | 7     | 8.5   | 10.7  | 0.442 | 16    | 0.795    | 0.098    |       | 2.12 | 0.26 | 50             | 35.5                     | 85.5       | 6.3     | 6.4      | 3.6                | 7.3   |  |
| 7     | 83       | 514   | 0.125  | 154   | 766  | 9.1   | 4.1   | 10.7  | 0.577 | 125   |          |          |       |      |      | 18.2           | 3.2                      | 21.4       | 1.4     | 66.9     | 5.2                | 10.7  |  |
| 8     | 18       | 138   | 0.0147 | 234   | 434  | 6.2   | 1.2   | 8.4   | 0.5   | 47    | 0.6      | 0.252    |       | 8.81 | 3.69 | 1.4            | 5.4                      | 6.8        | 0.5     | 83.1     | 3.2                | 8.8   |  |
| 9     | 91       | 1173  | 0.2555 | 178   | 606  | 4.5   | 14.2  | 12    | 0.585 | 4     |          |          |       |      |      | 85.7           | 6.2                      | 91.9       | 1.7     | 0.4      | 0                  | 4.1   |  |
| 10    |          |       |        |       |      |       |       |       |       | 401   |          |          |       |      |      | 4.2            | 13.4                     | 17.6       | 17.7    | 72.4     | 22.7               | 6.3   |  |
| 11(a) | 668      | 1406  | 0.1353 | 153   | 1443 | 20.3  | 3.7   | 11    | 0.477 | 316   | 2.215    | 5.222    |       | 3.87 | 9.13 | 9.8            | 25.6                     | 35.4       | 18.9    | 55.6     | 15.3               | 4.8   |  |
| 11(b) |          |       |        |       |      |       |       |       |       |       |          |          |       |      |      |                |                          |            |         |          |                    |       |  |
| 12    | 550      | 399   | 0.0433 | 154   | 1132 | 26.3  | 3.8   | 8.6   | 0.568 | 260   |          |          |       |      |      | 6.8            | 22.5                     | 29.3       | 1.2     | 64       | 11.7               | 6.7   |  |
| 13    | 5        | 769   | 0.0855 | 93    | 356  | -4.5  | 7.6   | 12.6  | 0.377 | 3     |          |          |       |      |      | 39.7           | 32.4                     | 72.1       | 2.7     | 12.8     | 0                  | 1.3   |  |
| 14    | 39       | 738   | 0.1261 | 37    | 230  | -14.5 | 3.6   | 13.1  | 0.241 | 1     |          |          |       |      |      | 2.4            | 69.7                     | 72.1       | 3       | 0        | 0                  | 0.1   |  |
| 15    | 260      | 1671  | 0.1476 | 92    | 506  | 18.5  | 2.2   | 9.3   | 0.331 | 165   | 2.929    | 1.794    | 0.46  | 14.4 | 8.82 | 0.4            | 46.4                     | 46.8       | 4.2     | 30       | 24.1               | 4.6   |  |
| 16    | 620      | 745   | 0.1477 | 242   | 1825 | 22.4  | 8.5   | 9.7   | 0.631 | 79    |          |          |       |      |      | 56.2           | 9.7                      | 65.9       | 6.3     | 30.5     | 3.4                | 1.9   |  |
| 17    | 9        | 590   | 0.1195 | 24    | 267  | -10.9 | 3.7   | 12.8  | 0.246 | 1     |          |          |       |      |      | 0.7            | 45.3                     | 46         | 1       | 0        | 0                  | 0.3   |  |
| 18    | 5        | 608   | 0.0857 | 49    | 337  | -8.6  | 6     | 12.9  | 0.318 | 1     |          |          |       |      |      | 64.7           | 11.4                     | 76.1       | 0.6     | 1.7      | 0                  | 0.4   |  |
| 19    | 80       | 795   | 0.0498 | 189   | 645  | 21    | 3.2   | 6.8   | 0.434 | 32    |          |          |       |      |      | 0.7            | 67.7                     | 68.4       | 2.8     | 26.3     | 0.9                | 4.5   |  |
| 20    | 23       | 634   | 0.0964 | 184   | 339  | -4.2  | 8.2   | 12.4  | 0.375 | 1     | 0.838    | 0.855    | 2.95  | 4.93 | 5.03 | 66             | 14.7                     | 80.7       | 48.9    | 2.6      | 0                  | 1.9   |  |
| 21    | 920      | 1224  | 0.2527 | 194   | 1934 | 23.7  | 5.3   | 12.2  | 0.548 | 83    |          |          |       |      |      | 37.2           | 14.8                     | 52         | 0.2     | 35.8     | 2.4                | 10.3  |  |



|       |      |      |        |     |      |       |     |      |       |     |       |        |      |       |        |      |      |      |      |      |     |      |
|-------|------|------|--------|-----|------|-------|-----|------|-------|-----|-------|--------|------|-------|--------|------|------|------|------|------|-----|------|
| 22(a) |      |      |        |     |      |       |     |      |       |     |       |        |      |       |        |      |      |      |      |      |     |      |
| 22(b) | 200  | 854  | 0.0858 | 210 | 1644 | 22.5  | 8.1 | 10.5 | 0.609 | 71  | 2.81  | 1.18   | 2.2  | 4.75  | 2      | 41.5 | 17.2 | 58.7 | 8.7  | 37.8 | 2.9 | 2.1  |
| 22(c) | 200  | 854  | 0.0858 | 210 | 1644 | 22.5  | 8.1 | 10.5 | 0.609 | 71  | 2.81  | 1.18   | 2.2  | 4.75  | 2      | 41.5 | 17.2 | 58.7 | 8.7  | 37.8 | 2.9 | 2.1  |
| 23    | 120  | 646  | 0.0497 | 214 | 776  | 10.3  | 3.1 | 11.1 | 0.487 | 27  | 1.319 | 0.32   |      | 8.79  | 2.14   | 22.2 | 28.5 | 50.7 | 20   | 35.8 | 3.1 | 12.7 |
| 24    | 29   | 272  | 0.0337 | 161 | 469  | 18.5  | 4   | 7.8  | 0.444 | 6   |       |        |      |       |        | 8    | 62.1 | 70.1 | 3.4  | 28.4 | 1.6 | 1.2  |
| 25    | 33   | 337  | 0.0303 | 294 | 1068 | 27.4  | 3.1 | 8.8  | 0.467 | 43  | 0.593 | 0.414  | 3.27 | 3.71  | 2.59   | 0.9  | 68.6 | 69.5 | 4.1  | 4.4  | 0.1 | 0.5  |
| 26    | 40   | 892  | 0.0577 | 221 | 944  | 24.3  | 2.8 | 8    | 0.454 | 46  | 0.089 | 0.116  |      | 2.95  | 3.85   | 2    | 53   | 55   | 6.1  | 10.7 | 1.4 | 1    |
| 27    | 6    | 305  | 0.0345 | 216 | 393  | -0.6  | 4.4 | 20   | 0.406 | 10  | 1.182 | 0.115  |      | 9.09  | 0.88   | 33.9 | 16   | 49.9 | 11.2 | 36.9 | 0.5 | 3    |
| 28    | 100  | 1255 | 0.0484 | 160 | 362  | 18.1  | 1.4 | 4.8  | 0.318 | 10  | 0.25  | 0.106  | 2.18 | 2.5   | 1.06   | 0.2  | 85   | 85.2 | 0.8  | 6    | 0.5 | 2.2  |
| 29    | 150  | 347  | 0.0549 | 228 | 2359 | 26.1  | 8.2 | 11.2 | 0.592 | 17  |       |        |      |       |        | 50.5 | 37.8 | 88.3 | 15.3 | 7.6  | 0.2 | 2.6  |
| 30    | 30   | 503  | 0.0443 | 228 | 1155 | 21.5  | 3.3 | 15   | 0.424 | 26  | 1.432 | 0.279  | 2.64 | 8.68  | 1.69   | 18.1 | 33   | 51.1 | 10.9 | 43.3 | 0.5 | 4.2  |
| 31    | 1100 | 897  | 0.1315 | 306 | 1597 | 21    | 7.7 | 9.2  | 0.605 | 191 |       |        |      |       |        | 43.2 | 15.5 | 58.7 | 5.4  | 36.3 | 3.9 | 2.1  |
| 32    |      |      |        |     |      |       |     |      |       |     |       |        |      |       |        | 43.4 | 48.3 | 91.7 | 9.5  | 5.5  | 0.4 | 0.5  |
| 33    | 9    | 627  | 0.0449 | 261 | 1141 | 23.1  | 4   | 6.1  | 0.468 | 45  |       |        |      |       |        | 3.1  | 31.8 | 34.9 | 9.7  | 60.2 | 0.3 | 2.8  |
| 34    | 8    | 223  | 0.0216 | 133 | 706  | 28.4  | 2.7 | 5.7  | 0.466 | 10  |       | 0.072  |      | 1.5   |        | 0.1  | 68.2 | 68.3 | 3.6  | 4.8  | 0   | 0.1  |
| 35    | 13   | 127  | 0.0141 | 342 | 474  | 0     | 8.1 | 14.4 | 0.466 | 6   | 4.498 | 0.197  |      | 13.63 | 0.6    | 83.4 | 0.4  | 83.8 | 1.5  | 11.7 | 0   | 3    |
| 36    | 149  | 598  | 0.0805 | 198 | 1501 | 19.8  | 2.8 | 6.8  | 0.463 | 194 |       |        |      |       |        | 9.6  | 6.1  | 15.7 | 1.3  | 66.5 | 5.2 | 5.3  |
| 37    | 4    | 274  | 0.0407 | 210 | 837  | 4.4   | 5.8 | 10.9 | 0.519 | 59  | 1.632 | 0.326  | 5.98 | 3.75  | 0.75   | 43.5 | 0.1  | 43.6 | 47.2 | 16.4 | 0.2 | 14.5 |
| 38    | 57   | 625  | 0.0933 | 200 | 282  | 18.6  | 1.6 | 5.5  | 0.332 | 57  |       |        |      |       |        | 1.2  | 47.7 | 48.9 | 2.9  | 25.4 | 9.1 | 6.2  |
| 39    | 14   | 746  | 0.129  | 30  | 129  | -14.8 | 3.5 | 13.5 | 0.235 |     |       |        |      |       |        |      |      |      |      |      |     |      |
| 40    | 250  | 1527 | 0.1321 | 196 | 1074 | 14.4  | 5.3 | 10.4 | 0.457 | 226 | 5.69  | 6.144  | 2.52 | 12.37 | 13.36  | 6.3  | 28.2 | 34.5 | 3    | 47.6 | 7.1 | 3    |
| 41    | 1400 | 1838 | 0.1197 | 179 | 485  | 9.2   | 2   | 8.5  | 0.367 | 156 | 0.481 | 14.678 | 0.7  | 6.25  | 190.63 | 1.5  | 60   | 61.5 | 1.1  | 29.5 | 7.2 | 5.9  |
| 42    | 71   | 748  | 0.1468 | 219 | 337  | -4.9  | 4.2 | 14.7 | 0.251 | 1   | 0.953 | 0.307  | 0.32 | 4.14  | 1.33   | 64   | 27.6 | 91.6 | 27.8 | 0    | 0   | 0.4  |
| 43    | 11   | 775  | 0.037  | 310 | 1520 | 24    | 8.4 | 12.5 | 0.603 | 15  | 2.465 | 0.68   | 7    | 7.25  | 2      | 44   | 45.4 | 89.4 | 9    | 7.2  | 0   | 0.2  |
| 44    |      |      |        |     |      |       |     |      |       | 18  |       |        |      |       |        | 4    | 72   | 76   | 7.6  | 19.9 | 0.1 | 0.7  |

**(c) Concentrations (data without reference are from Gaillardet et al., 1999)**

|       | pH   | TDS<br>mg/L | TSS<br>mg/L | Na<br>μmol/L | K<br>μmol/L | Ca<br>μmol/L | Mg<br>μmol/L | Cl<br>μmol/L | SO <sub>4</sub><br>μmol/L | HCO <sub>3</sub><br>μmol/L | SiO <sub>2</sub><br>μmol/L | T <sub>z</sub> <sup>+</sup> | Source                                           |
|-------|------|-------------|-------------|--------------|-------------|--------------|--------------|--------------|---------------------------|----------------------------|----------------------------|-----------------------------|--------------------------------------------------|
| 1(a)  |      | 122         |             | 278          | 28.9        | 477          | 96.7         | 183          | 73                        | 1122                       | 185                        | 1454.3                      | Stallard and Edmond, 1983                        |
| 1(b)  |      | 38          | 182         | 63.4         | 20.8        | 129          | 39.8         | 30.5         | 17.8                      | 323                        | 120                        | 421.8                       | Stallard and Edmond, 1983                        |
| 2     |      | 55          | 72          | 126          | 26          | 223          | 95           | 66           | 65                        | 477                        | 36                         | 788                         |                                                  |
| 3     | 7.6  | 110         | 1060        | 100          | 50          | 390          | 170          | 20           | 60                        | 1110                       | 160                        | 1270                        | Galy and France-Lanord, 1999                     |
| 4     |      |             |             |              |             |              |              |              |                           |                            |                            |                             |                                                  |
| 5     |      |             |             |              |             |              |              |              |                           |                            |                            |                             |                                                  |
| 6     |      | 115         | 64          | 217          | 28          | 450          | 206          | 86           | 115                       | 1033                       | 150                        | 1557                        |                                                  |
| 7     |      | 428         | 313         | 739          | 51          | 1473         | 1117         | 1509         | 660                       | 3328                       | 69                         | 5970                        |                                                  |
| 8     |      | 829         | 80          | 6348         | 26          | 2073         | 1481         | 4200         | 2240                      | 3295                       | 5                          | 13482                       |                                                  |
| 9     |      |             |             |              |             |              |              |              |                           |                            |                            |                             |                                                  |
| 10    | 7.6  | 130         | 1100        | 180          | 70          | 470          | 200          | 90           | 80                        | 1420                       | 130                        | 1590                        | Galy and France-Lanord, 1999                     |
| 11(a) |      | 196         |             | 613          | 69          | 710          | 496          | 169          | 146                       | 2684                       | 158                        | 3094                        | Sarin et al., 1989                               |
| 11(b) |      |             |             |              |             |              |              |              |                           |                            |                            |                             | Galy and France-Lanord, 1999                     |
| 12    |      | 193         | 1619        | 352          | 56          | 755          | 99           | 403          | 104                       | 1721                       | 352                        | 2116                        |                                                  |
| 13    |      | 112         | 23          | 226          | 26          | 413          | 152          | 271          | 104                       | 939                        | 138                        | 1382                        |                                                  |
| 14    |      | 34          |             |              |             | 137.5        | 66.667       | 70.423       | 96.875                    | 165.574                    |                            | 408.334                     | SCOPE 42 - Biogeochemistry of Major World Rivers |
| 15    | 8.21 | 158         |             | 191          | 68          | 637          | 210          | 73           | 313                       | 1060                       | 71                         | 1953                        | Karim and Veizer, 2000                           |
| 16    |      | 201         | 535         | 1304         | 51          | 250          | 247          | 514          | 52                        | 1967                       | 167                        | 2349                        |                                                  |
| 17    |      | 52          |             |              |             | 290          | 275          | 8.451        | 50                        | 472.131                    |                            | 1130                        | SCOPE 42 - Biogeochemistry of Major World Rivers |
| 18    |      | 92          |             | 74           | 10          | 360          | 141.5        | 25           | 72                        | 867                        | 67                         | 1087                        | Huh et al., 1998a                                |
| 19    |      | 238         | 1269        | 896          | 118         | 483          | 506          | 406          | 54                        | 2361                       | 295                        | 2992                        |                                                  |
| 20    | 7.5  | 209         | 134         | 330          | 26          | 890          | 337          | 226          | 369                       | 1803                       | 50                         | 2810                        |                                                  |

|       |      |       |       |       |      |        |        |       |       |        |       |         |                                                  |
|-------|------|-------|-------|-------|------|--------|--------|-------|-------|--------|-------|---------|--------------------------------------------------|
| 21    |      | 118   | 928   | 361   | 49   | 375    | 136    | 383   | 150   | 808    | 210   | 1432    |                                                  |
| 22(a) | 7.6  | 164.3 | 718.8 | 344.7 | 44.3 | 632.4  | 235.3  | 176.5 | 160.0 | 1592.7 | 174.0 | 2124.44 | This study                                       |
| 22(b) | 7.7  | 122.2 | 519.2 | 216.6 | 37.4 | 493.5  | 153.1  | 127.2 | 123.6 | 1164   | 175.6 | 1547.2  | This study                                       |
| 22(c) |      | 263   | 321   | 663   | 48   | 1001   | 367    | 448   | 343   | 2305   | 167   | 3447    |                                                  |
| 23    |      | 216   | 862   | 478   | 72   | 850    | 366    | 294   | 266   | 1902   | 127   | 2982    |                                                  |
| 24    |      | 453   | 1271  | 4391  | 154  | 525    | 700    | 4886  | 396   | 1541   | 83    | 6995    |                                                  |
| 25    |      | 59    | 260   | 78    | 28   | 138    | 78     | 26    | 5     | 549    | 233   | 538     |                                                  |
| 26    |      | 388   | 1400  | 2261  | 200  | 775    | 576    | 1257  | 542   | 2852   | 213   | 5163    |                                                  |
| 27    |      | 126   | 40    | 230   | 26   | 465    | 210    | 186   | 89    | 1279   | 43    | 1606    |                                                  |
| 28    |      |       |       |       |      |        |        |       |       |        |       |         |                                                  |
| 29    |      | 27    | 132   | 61    | 21   | 70     | 20.5   | 251   | 30    | 110    | 50    | 263     | Nemeth et al., 1982                              |
| 30    |      | 86    | 139   | 231   | 94   | 173    | 86     | 185   | 21    | 690    | 285   | 843     |                                                  |
| 31    | 8.2  | 172   | 1057  | 54    | 24   | 842    | 151    | 17    | 32    | 1968   | 169   | 2064    | Moon et al., 2007                                |
| 32    |      | 306   |       | 435   | 26   | 1150   | 658    | 571   | 10    | 3475   |       | 4077    |                                                  |
| 33    |      |       |       |       |      |        |        |       |       |        |       |         |                                                  |
| 34    |      |       |       |       |      |        |        |       |       |        |       |         |                                                  |
| 35    |      |       |       |       |      |        |        |       |       |        |       |         |                                                  |
| 36    | 7.76 | 185   |       | 259   | 47   | 791    | 271    | 69    | 125   | 2033   | 115   | 2430    | Zhang et al., 2007                               |
| 37    |      | 168   | 12    | 239   | 35   | 750    | 247    | 214   | 146   | 1656   | 40    | 2268    |                                                  |
| 38    | 8.33 | 277   |       | 279.6 | 36.9 | 1165.3 | 380.8  | 583.1 | 241.7 | 2521.3 | 211.7 | 3408.7  | Varol et al., 2013                               |
| 39    |      | 30    |       |       |      | 160    | 137.5  |       | 7.292 | 273.77 |       | 595     | SCOPE 42 - Biogeochemistry of Major World Rivers |
| 40    | 7.8  | 202   | 520   | 325   | 59   | 807.5  | 346    | 161   | 177   | 2110   | 103   | 2691    | Chen et al., 2002                                |
| 41    | 8    | 491   | 26900 | 2207  | 401  | 1115   | 1090.5 | 1797  | 999   | 3208   |       | 7019    | Chen et al., 2005                                |
| 42    |      | 183   | 286   | 113   | 31   | 795    | 295    | 31    | 233   | 1787   | 128   | 2324    |                                                  |
| 43    |      | 33    | 32    | 87    | 33   | 110    | 70     | 76    | 41.5  | 116    | 161   | 480     | Meybeck, 1984                                    |
| 44    |      | 80    | 194   | 235   | 49   | 265    | 169    | 186   | 31    | 525    | 280   | 1152    |                                                  |
| WSM   |      | 127   |       | 148   | 26   | 500    | 187.5  | 96    | 109.5 | 1256   | 134   | 1549    | Meybeck, 2004                                    |
| WDWA  |      | 97    |       | 240   | 44   | 297    | 122.5  | 167   | 87.5  | 798    | 145   | 1123    | Meybeck, 2004                                    |

WSM-World spatial median; WDWA-World discharge-weighted average.

**(d) Fluxes**

|       | TDS<br>Mt/y | TSS<br>Mt/y | Na<br>10 <sup>9</sup> mol/y | K     | Ca    | Mg    | Cl    | SO <sub>4</sub> | HCO <sub>3</sub> | SiO <sub>2</sub> | Source                                           |
|-------|-------------|-------------|-----------------------------|-------|-------|-------|-------|-----------------|------------------|------------------|--------------------------------------------------|
| 1(a)  |             |             |                             |       |       |       |       |                 |                  |                  | Stallard and Edmond, 1983                        |
| 1(b)  | 236.5       | 1107.7      | 394.5                       | 129.4 | 802.8 | 247.7 | 189.8 | 110.8           | 2010             | 746.8            | Stallard and Edmond, 1983                        |
| 2     | 22.4        | 52.4        | 51.3                        | 10.6  | 90.8  | 38.7  | 26.9  | 26.5            | 194.1            | 14.7             |                                                  |
| 3     | 56          | 648.7       | 55                          | 29    | 211   | 94    | 19    | 91              | 473              | 78               | Galy and France-Lanord, 1999                     |
| 4     |             | 10.9        |                             |       |       |       |       |                 |                  |                  |                                                  |
| 5     |             | 127.3       |                             |       |       |       |       |                 | 44.9             |                  |                                                  |
| 6     | 30.9        | 13.6        | 58.4                        | 7.5   | 121.1 | 55.4  | 23.1  | 30.9            | 277.9            | 40.4             |                                                  |
| 7     | 59.9        | 61.4        | 103.5                       | 7.1   | 206.2 | 156.4 | 211.3 | 92.4            | 465.9            | 9.7              |                                                  |
| 8     | 25.7        | 7           | 196.8                       | 0.81  | 64.3  | 45.9  | 130.2 | 69.4            | 102.1            | 0.16             |                                                  |
| 9     |             | 21.8        |                             |       |       |       |       |                 | 93.6             |                  |                                                  |
| 10    | 68.6        | 504.9       | 128                         | 29    | 252   | 93    | 40    | 39              | 713              | 59               | Galy and France-Lanord, 1999                     |
| 11(a) | 209.9       | 1097.5      | 656.5                       | 73.9  | 760.4 | 531.2 | 181   | 156.35          | 2874.6           | 169.2            | Sarin et al., 1989                               |
| 11(b) | 124.6       |             | 183                         | 59    | 462   | 187   | 59    | 130             | 1185             | 137              | Galy and France-Lanord, 1999                     |
| 12    | 28.4        | 165         | 51.7                        | 8.2   | 111   | 14.6  | 59.2  | 15.3            | 253              | 51.7             |                                                  |
| 13    | 74.5        | 12.2        | 150.3                       | 17.3  | 274.6 | 101.1 | 180.2 | 69.2            | 624.4            | 91.8             |                                                  |
| 14    | 1.8         | 13.3        |                             |       | 7.4   | 3.6   | 3.8   | 5.2             | 8.9              |                  | SCOPE 42 - Biogeochemistry of Major World Rivers |
| 15    | 39.7        | 228.8       | 47.9                        | 17.1  | 159.9 | 52.7  | 18.3  | 78.55           | 266.1            | 17.8             | Karim and Veizer, 2000                           |
| 16    | 92.3        | 248         | 598.5                       | 23.4  | 114.8 | 113.4 | 235.9 | 23.9            | 902.9            | 76.7             |                                                  |
| 17    | 6.3         | 5.3         |                             |       | 35.4  | 33.6  | 1     | 6.1             | 57.6             |                  | SCOPE 42 - Biogeochemistry of Major World Rivers |
| 18    | 36.2        | 11.6        | 29.1                        | 3.9   | 141.5 | 55.6  | 9.8   | 28.3            | 340.7            | 26.3             | Huh et al., 1998                                 |
| 19    | 6.4         | 24.8        | 24.2                        | 3.2   | 13    | 13.7  | 11    | 1.5             | 63.7             | 8                |                                                  |
| 20    | 54.3        | 34.8        | 85.8                        | 6.8   | 231.4 | 87.6  | 58.8  | 95.9            | 468.8            | 13               |                                                  |

|             |        |        |        |       |        |        |        |        |         |        |                                                  |
|-------------|--------|--------|--------|-------|--------|--------|--------|--------|---------|--------|--------------------------------------------------|
| 21          | 36.9   | 239.2  | 113    | 15.3  | 117.4  | 42.6   | 119.9  | 47     | 252.9   | 65.7   |                                                  |
| 22(a)       | 14.2   | 63.5   | 29.1   | 3.8   | 53.7   | 19.9   | 14.9   | 13.5   | 135.2   | 14.8   | This study                                       |
| 22(b)       | 40.4   | 170.7  | 68.8   | 11.9  | 157.3  | 48.7   | 40.3   | 39.3   | 371     | 56     | This study                                       |
| 22(c)       | 163.8  | 164    | 413    | 29.9  | 623.6  | 228.6  | 279.1  | 213.7  | 1436    | 104    |                                                  |
| 23          | 123.1  | 375.6  | 272.5  | 41    | 484.5  | 208.6  | 167.6  | 151.6  | 1084.1  | 72.4   |                                                  |
| 24          | 18.1   | 32.2   | 175.6  | 6.2   | 21     | 28     | 195.4  | 15.8   | 61.6    | 3.3    |                                                  |
| 25          | 9.8    | 49.5   | 12.9   | 4.6   | 22.9   | 12.9   | 4.3    | 0.8    | 91.1    | 38.7   |                                                  |
| 26          | 48.5   | 73.6   | 282.6  | 25    | 96.9   | 72     | 157.1  | 67.8   | 356.5   | 26.6   |                                                  |
| 27          | 60.1   | 19.1   | 109.7  | 12.4  | 221.8  | 100.2  | 88.7   | 42.5   | 610.1   | 20.5   |                                                  |
| 28          |        | 66     |        |       |        |        |        |        | 17.8    |        |                                                  |
| 29          | 20.5   | 144    | 46.3   | 15.9  | 53.1   | 15.6   | 190.5  | 22.75  | 83.5    | 38     | Nemeth et al., 1982                              |
| 30          | 57.3   | 92.6   | 153.8  | 62.6  | 115.2  | 57.3   | 123.2  | 14     | 459.5   | 189.8  |                                                  |
| 31          | 21.2   | 130    | 6.6    | 3     | 103.6  | 18.6   | 2.1    | 3.95   | 242.1   | 20.8   | Moon et al., 2007                                |
| 32          | 64.6   |        | 91.8   | 5.5   | 242.7  | 138.8  | 120.5  | 2.1    | 733.2   |        |                                                  |
| 33          |        | 5.3    |        |       |        |        |        |        | 188.8   |        |                                                  |
| 34          |        | 2.9    |        |       |        |        |        |        | 2.5     |        |                                                  |
| 35          |        | 3.9    |        |       |        |        |        |        | 239.4   |        |                                                  |
| 36          | 42.6   | 52.4   | 59.6   | 10.8  | 181.9  | 62.3   | 15.9   | 28.75  | 467.6   | 26.5   | Zhang et al., 2007                               |
| 37          | 60.5   | 4.3    | 86     | 12.6  | 270    | 88.9   | 77     | 52.6   | 596.2   | 14.4   |                                                  |
| 38          | 43.1   | 53     | 43.6   | 5.8   | 181.8  | 59.4   | 91     | 37.7   | 393.3   | 33     | Varol et al., 2013                               |
| 39          | 0.75   | 2.9    |        |       | 4      | 3.4    |        | 0.18   | 6.8     |        | SCOPE 42 - Biogeochemistry of Major World Rivers |
| 40          | 183.4  | 472.2  | 295.1  | 53.6  | 733.2  | 314.2  | 146.2  | 160.7  | 1915.9  | 93.5   | Chen et al., 2002                                |
| 41          | 16.2   | 887.7  | 72.8   | 13.2  | 36.8   | 36     | 59.3   | 32.95  | 105.9   |        | Chen et al., 2005                                |
| 42          | 30.9   | 48.3   | 19.1   | 5.2   | 134.4  | 49.9   | 5.2    | 39.4   | 302     | 21.6   |                                                  |
| 43          | 42.8   | 41.5   | 112.9  | 42.8  | 142.8  | 90.9   | 98.6   | 53.85  | 150.6   | 209    | Meybeck, 1984                                    |
| 44          | 8.7    | 45.9   | 25.6   | 5.3   | 28.9   | 18.4   | 20.3   | 3.4    | 57.2    | 30.5   |                                                  |
| Sum         | 2103.9 | 7409.8 | 4862.8 | 778.9 | 7409.8 | 3391.9 | 3181.4 | 1887.4 | 20209.8 | 2500.6 |                                                  |
| World total | 3618.2 | 12610  | 8460   | 1240  | 12500  | 5230   | 6120   | 2060   | 31900   | 6480   | Glay and France-Lanord, 1999                     |

Fluxes are calculated by multiplying concentrations by annual discharge.

**(e) Specific flux**

|       |                    | TDS                  | TSS                  | Na                                     | K    | Ca    | Mg    | Cl   | SO <sub>4</sub> | HCO <sub>3</sub> | SiO <sub>2</sub> |
|-------|--------------------|----------------------|----------------------|----------------------------------------|------|-------|-------|------|-----------------|------------------|------------------|
|       |                    | t/km <sup>2</sup> /y | t/km <sup>2</sup> /y | 10 <sup>3</sup> mol/km <sup>2</sup> /y |      |       |       |      |                 |                  |                  |
| 1(a)  | Amazon (upper)     |                      |                      |                                        |      |       |       |      |                 |                  |                  |
| 1(b)  | Amazon (lower)     | 40.6                 | 190                  | 67.7                                   | 22   | 138   | 42.5  | 32.6 | 19              | 344.8            | 128              |
| 2     | Amur               | 12                   | 28                   | 27.4                                   | 5.7  | 48.5  | 20.7  | 14.4 | 14.1            | 103.8            | 7.8              |
| 3     | Brahmaputra        | 96.1                 | 1112.7               | 94.3                                   | 50   | 362   | 161   | 32.6 | 156.1           | 811.3            | 134              |
| 4     | Chao Phraya        |                      | 68                   |                                        |      |       |       |      |                 |                  |                  |
| 5     | Colorado           |                      | 190                  |                                        |      |       |       |      |                 | 67               |                  |
| 6     | Columbia           | 49.9                 | 22                   | 94.2                                   | 12   | 195   | 89.4  | 37.3 | 49.9            | 448.2            | 65               |
| 7     | Danube             | 81                   | 83                   | 139.8                                  | 9.6  | 279   | 211   | 286  | 124.9           | 629.6            | 13               |
| 8     | Don                | 65.9                 | 18                   | 504.6                                  | 2.1  | 165   | 118   | 334  | 178.1           | 261.9            | 0.4              |
| 9     | Fraser             |                      | 91                   |                                        |      |       |       |      |                 | 390              |                  |
| 10    | Ganges             | 64.7                 | 476.3                | 120.8                                  | 27   | 238   | 87.7  | 37.7 | 36.8            | 672.6            | 55.7             |
| 11(a) | Ganges-Brahmaputra | 127.8                | 668                  | 399.6                                  | 45   | 463   | 323   | 110  | 95.2            | 1750             | 103              |
| 11(b) | Ganges-Brahmaputra | 75.8                 |                      | 111.4                                  | 35.9 | 281.2 | 113.8 | 35.9 | 79.1            | 721.2            | 83.4             |
| 12    | Godavari           | 94.6                 | 550                  | 172.5                                  | 27   | 370   | 48.5  | 198  | 51.0            | 843.3            | 172              |
| 13    | Yenisei            | 30.5                 | 5                    | 61.6                                   | 7.1  | 113   | 41.4  | 73.9 | 28.3            | 255.9            | 38               |
| 14    | Indigirka          | 5.4                  | 39                   |                                        |      | 21.8  | 10.6  | 11.2 | 15.4            | 26.3             |                  |
| 15    | Indus              | 45.1                 | 260                  | 54.5                                   | 19   | 182   | 59.9  | 20.8 | 89.3            | 302.3            | 20               |
| 16    | Irrawaddy          | 230.6                | 620                  | 1496.3                                 | 59   | 287   | 283   | 590  | 59.7            | 2257             | 192              |
| 17    | Kolyma             | 10.8                 | 9                    |                                        |      | 60    | 56.9  | 1.7  | 10.3            | 97.6             |                  |
| 18    | Lena               | 15.6                 | 5                    | 12.5                                   | 1.7  | 61    | 24    | 4.2  | 12.2            | 146.9            | 11               |
| 19    | Limpopo            | 20.7                 | 80                   | 78                                     | 10   | 42.1  | 44.1  | 35.4 | 4.7             | 205.6            | 26               |
| 20    | Mackenzie          | 37                   | 23.7                 | 58.4                                   | 4.6  | 157   | 59.6  | 40   | 65.3            | 318.9            | 8.8              |
| 21    | Magdalena          | 142.1                | 920                  | 434.6                                  | 59   | 451   | 164   | 461  | 180.6           | 972.7            | 253              |

|            |                      |       |        |       |     |      |      |      |       |       |      |
|------------|----------------------|-------|--------|-------|-----|------|------|------|-------|-------|------|
| 22(a)      | Mekong (Chiang Saen) | 75.1  | 336.0  | 154.1 | 20  | 284  | 106  | 78.7 | 71.6  | 715.4 | 78.2 |
| 22(b)      | Mekong (Pakse)       | 74.1  | 313.2  | 126.2 | 22  | 289  | 89.4 | 73.9 | 72.1  | 680.7 | 103  |
| 22(c)      | Mekong               | 199.8 | 200    | 503.7 | 37  | 761  | 279  | 340  | 260.6 | 1751  | 127  |
| 23         | Mississippi          | 39.3  | 120    | 87    | 13  | 155  | 66.7 | 53.5 | 48.4  | 346.4 | 23   |
| 24         | Murray Darling       | 16.3  | 29     | 158.2 | 5.5 | 18.9 | 25.2 | 176  | 14.3  | 55.5  | 3    |
| 25         | Niger                | 6.5   | 33     | 8.6   | 3.1 | 15.3 | 8.6  | 2.9  | 0.6   | 60.8  | 26   |
| 26         | Nile                 | 26.4  | 40     | 153.6 | 14  | 52.6 | 39.1 | 85.4 | 36.8  | 193.8 | 14   |
| 27         | Ob                   | 20    | 6.3    | 36.4  | 4.1 | 73.7 | 33.3 | 29.5 | 14.1  | 202.7 | 6.8  |
| 28         | Orange               |       | 100    |       |     |      |      |      |       | 27    |      |
| 29         | Orinoco              | 21.3  | 150    | 48.2  | 17  | 55.3 | 16.2 | 198  | 23.7  | 87    | 40   |
| 30         | Parana               | 20.2  | 32.6   | 54.2  | 22  | 40.6 | 20.2 | 43.4 | 4.9   | 161.8 | 67   |
| 31         | Red                  | 176.3 | 1083.4 | 55.4  | 25  | 863  | 155  | 17.4 | 32.8  | 2017  | 173  |
| 32         | Salween              | 198.7 |        | 282.4 | 17  | 747  | 427  | 371  | 6.5   | 2256  |      |
| 33         | Sao Francisco        |       | 9      |       |     |      |      |      |       | 320   |      |
| 34         | Senegal              |       | 8      |       |     |      |      |      |       | 7     |      |
| 35         | Severnaia Dvina      |       | 13     |       |     |      |      |      |       | 798   |      |
| 36         | Xijiang              | 120.9 | 149    | 169.2 | 31  | 517  | 177  | 45.1 | 81.7  | 1328  | 75   |
| 37         | St. Lawrence         | 69.5  | 5      | 98.9  | 15  | 310  | 102  | 88.6 | 60.4  | 685.2 | 17   |
| 38         | Tigris-Euphrates     | 46.4  | 57     | 46.9  | 6.2 | 196  | 63.9 | 97.8 | 40.5  | 422.9 | 36   |
| 39         | Yana                 | 3.6   | 14     |       |     | 19   | 16.4 |      | 0.9   | 32.6  |      |
| 40         | Yangtze              | 105.4 | 271.4  | 169.6 | 31  | 421  | 181  | 84   | 92.4  | 1101  | 54   |
| 41         | Yellow               | 21.6  | 1183.6 | 97.1  | 18  | 49.1 | 48   | 79.1 | 44.0  | 141.2 |      |
| 42         | Yukon                | 39.7  | 62     | 24.5  | 6.7 | 172  | 63.9 | 6.7  | 50.5  | 387.2 | 28   |
| 43         | Zaire                | 11.9  | 11.5   | 31.4  | 12  | 39.7 | 25.2 | 27.4 | 15.0  | 41.8  | 58   |
| 44         | Zambesi              | 6.7   | 35     | 19.6  | 4.1 | 22   | 14.1 | 15.5 | 2.6   | 43.7  | 23   |
| World mean |                      | 24.4  | 85.1   | 57.1  | 8.4 | 84.4 | 35.3 | 41.3 | 13.9  | 215.3 | 43.7 |

Specific flux (areal yield) is annual flux normalized to drainage area



**Table S5.** Statistically historical trends as year for concentrations and fluxes of TSS and major ions in the Mekong River.

(a) Chiang Saen

|                                                    | Y                       | R <sup>2</sup> | Adjusted R <sup>2</sup> | p                |
|----------------------------------------------------|-------------------------|----------------|-------------------------|------------------|
| <i>Chiang Saen</i>                                 |                         |                |                         |                  |
| <i>Observed mean (Y≥1985)</i>                      |                         |                |                         |                  |
| TSS                                                | 34982.594 - 17.350 * Y  | 0.62           | 0.604                   | <b>&lt;0.001</b> |
| Ca                                                 | -23.085 + 0.0254 * Y    | 0.0117         | 0                       | 0.591            |
| Mg                                                 | -160.989 + 0.0841 * Y   | 0.334          | 0.307                   | <b>0.002</b>     |
| Na                                                 | -0.478 + 0.00523 * Y    | 0.003          | 0                       | 0.797            |
| K                                                  | 7.976 - 0.00306 * Y     | 0.009          | 0                       | 0.647            |
| HCO <sub>3</sub>                                   | -267.252 + 0.188 * Y    | 0.04           | 0.004                   | 0.304            |
| Cl                                                 | -114.647 + 0.0621 * Y   | 0.14           | 0.11                    | <b>0.055</b>     |
| SO <sub>4</sub>                                    | -637.008 + 0.329 * Y    | 0.241          | 0.211                   | <b>0.009</b>     |
| Si                                                 | -103.120 + 0.0545 * Y   | 0.398          | 0.365                   | <b>0.003</b>     |
| <i>Discharge-weighted mean (Y≥1985)</i>            |                         |                |                         |                  |
| TSS                                                | 141012.367 - 70.494 * Y | 0.416          | 0.343                   | <b>0.044</b>     |
| Ca                                                 | 455.992 - 0.216 * Y     | 0.153          | 0.0476                  | 0.263            |
| Mg                                                 | -140.933 + 0.0738 * Y   | 0.140          | 0.0321                  | 0.287            |
| Na                                                 | -79.510 + 0.0441 * Y    | 0.0708         | 0                       | 0.457            |
| K                                                  | 3.817 - 0.00104 * Y     | 0.0006         | 0                       | 0.945            |
| HCO <sub>3</sub>                                   | -631.971 + 0.368 * Y    | 0.0592         | 0                       | 0.498            |
| Cl                                                 | 37.533 - 0.0154 * Y     | 0.002          | 0                       | 0.896            |
| SO <sub>4</sub>                                    | 768.743 - 0.378 * Y     | 0.231          | 0.134                   | 0.16             |
| Si                                                 | -16.117 + 0.0106 * Y    | 0.0105         | 0                       | 0.778            |
| <i>Historical discharge-weighted mean (Y≥1960)</i> |                         |                |                         |                  |
| TSS                                                | 6094.421 - 2.710 * Y    | 0.033          | 0.0119                  | 0.217            |
| Ca                                                 | 9.450 + 0.00799 * Y     | 0.0349         | 0.0139                  | 0.203            |
| Mg                                                 | -0.150 + 0.00292 * Y    | 0.0335         | 0.0125                  | 0.213            |
| Na                                                 | -4.762 + 0.00640 * Y    | 0.0317         | 0.0106                  | 0.226            |
| K                                                  | 1.642 + 0.0000432 * Y   | 0.0242         | 0.003                   | 0.291            |
| HCO <sub>3</sub>                                   | 27.759 + 0.0350 * Y     | 0.0343         | 0.0133                  | 0.208            |
| Cl                                                 | -5.669 + 0.00602 * Y    | 0.0310         | 0.0099                  | 0.232            |
| SO <sub>4</sub>                                    | -5.961 + 0.0107 * Y     | 0.0328         | 0.0118                  | 0.218            |
| Si                                                 | 2.239 + 0.00133 * Y     | 0.0349         | 0.0139                  | 0.204            |
| <i>Annual flux (Model 2; Y≥1960)</i>               |                         |                |                         |                  |
| TSS                                                | 835.551 - 0.389 * Y     | 0.0347         | 0.0137                  | 0.205            |
| Ca                                                 | 8.842 - 0.00335 * Y     | 0.0264         | 0.00523                 | 0.270            |
| Mg                                                 | 1.764 - 0.000638 * Y    | 0.0268         | 0.0056                  | 0.267            |
| Na                                                 | 2.049 - 0.000687 * Y    | 0.0261         | 0.005                   | 0.272            |
| K                                                  | 0.638 - 0.000247 * Y    | 0.027          | 0.0058                  | 0.265            |
| HCO <sub>3</sub>                                   | 32.859 - 0.0123 * Y     | 0.0264         | 0.0053                  | 0.27             |
| Cl                                                 | 1.189 - 0.000332 * Y    | 0.0166         | 0                       | 0.382            |
| SO <sub>4</sub>                                    | 4.871 - 0.00175 * Y     | 0.0266         | 0.0054                  | 0.268            |
| Si                                                 | 1.651 - 0.000622 * Y    | 0.0267         | 0.0056                  | 0.267            |

## (b) Pakse

|                                                                          | Y                      | R <sup>2</sup> | Adjusted R <sup>2</sup> | p                |
|--------------------------------------------------------------------------|------------------------|----------------|-------------------------|------------------|
| <i>Pakse</i>                                                             |                        |                |                         |                  |
| <i>Observed mean (Y<sub>≥1985</sub>)</i>                                 |                        |                |                         |                  |
| TSS                                                                      | 18360.047 - 9.101 * Y  | 0.421          | 0.397                   | <b>&lt;0.001</b> |
| Ca                                                                       | 91.467 - 0.0343 * Y    | 0.0160         | 0                       | 0.53             |
| Mg                                                                       | -65.449 + 0.0351 * Y   | 0.120          | 0.085                   | 0.076            |
| Na                                                                       | -26.855 + 0.0167 * Y   | 0.00517        | 0                       | 0.727            |
| K                                                                        | 13.237 - 0.00586 * Y   | 0.0092         | 0                       | 0.642            |
| HCO <sub>3</sub>                                                         | 202.581 - 0.0600 * Y   | 0.006          | 0                       | 0.701            |
| Cl                                                                       | -214.332 + 0.111 * Y   | 0.196          | 0.164                   | <b>0.021</b>     |
| SO <sub>4</sub>                                                          | -137.758 + 0.0768 * Y  | 0.0205         | 0                       | 0.476            |
| Si                                                                       | -130.859 + 0.0685 * Y  | 0.206          | 0.159                   | <b>0.051</b>     |
| <i>Observed mean in the recent decade (2001-2011)</i>                    |                        |                |                         |                  |
| Ca                                                                       | 1192.518 - 0.583 * Y   | 0.490          | 0.433                   | <b>0.016</b>     |
| Na                                                                       | - 1068 + 0.536*Y       | 0.638          | 0.602                   | <b>0.002</b>     |
| HCO <sub>3</sub>                                                         | 2679.242 - 1.294*Y     | 0.583          | 0.536                   | <b>0.006</b>     |
| Cl                                                                       | -760.724 + 0.383 * Y   | 0.284          | 0.205                   | <b>0.091</b>     |
| <i>Discharge-weighted observed mean (Y<sub>≥1985</sub>)</i>              |                        |                |                         |                  |
| TSS                                                                      | 28580.072 - 14.111 * Y | 0.0872         | 0                       | <b>0.407</b>     |
| Ca                                                                       | -202.987 + 0.112 * Y   | 0.138          | 0.0519                  | 0.234            |
| Mg                                                                       | -167.398 + 0.0860 * Y  | 0.142          | 0.0558                  | 0.228            |
| Na                                                                       | 303.926 - 0.150 * Y    | 0.262          | 0.18                    | 0.107            |
| K                                                                        | 39.003 - 0.0189 * Y    | 0.0187         | 0                       | 0.689            |
| HCO <sub>3</sub>                                                         | -458.762 + 0.268 * Y   | 0.0425         | 0                       | 0.520            |
| Cl                                                                       | -389.942 + 0.199 * Y   | 0.336          | 0.269                   | <b>0.048</b>     |
| SO <sub>4</sub>                                                          | -1003.664 + 0.511 * Y  | 0.395          | 0.334                   | <b>0.029</b>     |
| Si                                                                       | -331.721 + 0.169 * Y   | 0.451          | 0.39                    | <b>0.024</b>     |
| <i>Historical discharge-weighted mean (Y<sub>≥1923</sub>) (modelled)</i> |                        |                |                         |                  |
| TSS                                                                      | 2582.962 - 1.051 * Y   | 0.0432         | 0.0315                  | 0.058            |
| Ca                                                                       | 9.811 + 0.00505 * Y    | 0.0720         | 0.0607                  | <b>0.014</b>     |
| Mg                                                                       | 0.928 + 0.00140 * Y    | 0.0714         | 0.0601                  | <b>0.014</b>     |
| Na                                                                       | -0.521 + 0.00280 * Y   | 0.0749         | 0.0637                  | <b>0.012</b>     |
| K                                                                        | 1.345 + 0.0000580 * Y  | 0.0740         | 0.0627                  | <b>0.012</b>     |
| HCO <sub>3</sub>                                                         | 36.845 + 0.0174 * Y    | 0.0717         | 0.0603                  | <b>0.014</b>     |
| Cl                                                                       | -2.799 + 0.00372 * Y   | 0.0727         | 0.0614                  | <b>0.013</b>     |
| SO <sub>4</sub>                                                          | 0.696 + 0.00569 * Y    | 0.0727         | 0.0614                  | <b>0.013</b>     |
| Si                                                                       | 3.055 + 0.000948 * Y   | 0.0732         | 0.0619                  | <b>0.013</b>     |
| <i>Annual flux (Model 2; Y<sub>≥1923</sub>)</i>                          |                        |                |                         |                  |
| TSS                                                                      | 1131.257 - 0.489 * Y   | 0.0391         | 0.0274                  | 0.071            |
| Ca                                                                       | 20.483 - 0.00715 * Y   | 0.0490         | 0.0374                  | <b>0.043</b>     |
| Mg                                                                       | 3.690 - 0.00127 * Y    | 0.0491         | 0.0375                  | <b>0.043</b>     |
| Na                                                                       | 4.750 - 0.00155 * Y    | 0.0491         | 0.0375                  | <b>0.043</b>     |
| K                                                                        | 1.570 - 0.000562 * Y   | 0.0483         | 0.0367                  | <b>0.045</b>     |
| HCO <sub>3</sub>                                                         | 75.189 - 0.0264 * Y    | 0.0490         | 0.037                   | <b>0.043</b>     |
| Cl                                                                       | 4.631 - 0.00147 * Y    | 0.0491         | 0.0375                  | <b>0.043</b>     |
| SO <sub>4</sub>                                                          | 10.049 - 0.00320 * Y   | 0.0443         | 0.0326                  | 0.055            |
| Si                                                                       | 5.571 - 0.00198 * Y    | 0.0489         | 0.0373                  | <b>0.043</b>     |

## References

- Amiotte Suchet P, Probst JL, Ludwig W. Worldwide distribution of continental rock lithology: Implications for the atmospheric/soil CO<sub>2</sub> uptake by continental weathering and alkalinity river transport to the oceans. *Glob Biogeochem Cycles* 2003;17:1038.  
[http://multimedia.wri.org/watersheds\\_2003/](http://multimedia.wri.org/watersheds_2003/) (read on 20 April 2014)
- Huh Y, Tsoi MY, Zaitsev A, Edmond JM. The fluvial geochemistry of the rivers of Eastern Siberia: I. Tributaries of the Lena River draining the sedimentary platform of the Siberian Craton. *Geochim Cosmochim Acta* 1998a;62:1657–76.
- Gaillardet J, Duprè B, Louvat P, Allègre CJ. Global silicate weathering and CO<sub>2</sub> consumption rates deduced from the chemistry of large rivers. *Chem Geol* 1999;159:3–30.
- Galy A, France-Lanord C. Weathering processes in the Ganges–Brahmaputra basin and the riverine alkalinity budget. *Chem Geol* 1999;159:31–60.
- Karim A, Veizer J. Weathering processes in the Indus River Basin: implications from riverine carbon, sulfur, oxygen, and strontium isotopes. *Chem Geol* 2000;170(1–4):153–77.
- Ludwig W, Probst JL, Kempe S. Predicting the oceanic input of organic carbon by continental erosion. *Global Biogeochem. Cycl.* 1996; 10: 23–41.
- Meybeck M. Les fleuves et le cycle géochimique des éléments. Paris: Univ. Pierre et Marie Curie; 1984 [Thèse de Doctorat d'Etat].
- Meybeck M. Global occurrence of major elements in rivers. In: Drever JI, editor. *Treatise on geochemistry*, vol. 5. New York: Elsevier; 2004. p. 202–33.
- Moon S, Huh Y, Qin J, Pho NV. Chemical weathering in the Hong (Red) River basin: rates of silicate weathering and their controlling factors. *Geochim Cosmochim Acta* 2007;71:1411–30.
- Nemeth A, Paolini J, Herrera R. Carbon transport in the Orinoco River: the preliminary results. In: Degens ET, editor. *Transport of carbon and minerals in major world rivers*. Hamburg, Germany: Univ. of Hamburg; 1982. p. 357–64.
- Sarin MM, Krishnaswamy S, Dilli K, Somayajulu BLK, Moore WS. Major ion chemistry of Ganga–Brahmaputra river system: weathering processes and fluxes of the Bay of Bengal. *Geochim Cosmochim Acta* 1989;53:997–1009.
- Stallard RF, Edmond JM. Geochemistry of the Amazon 2. The influence of geology and weathering environment on the dissolved load. *J Geophys Res* 1983;88(C14): 9671–88.
- SCOPE 42 - Biogeochemistry of Major World Rivers  
(<http://www.scopenvironment.org/downloadpubs/scope42/chapter04.html>; read on 20 April 2014)

Varol M, Gokot B, Bekleyen B, Sen B. Geochemistry of the Tigris River basin, Turkey: spatial and seasonal variations of major ion compositions and their controlling factors. *Quat Int* 2013;304:22–32.

Zhang SR, Lu XX, Higgitt DL, Chen CTA, Sun HG, Han JT. Water chemistry of the Zhujiang (Pearl River): natural processes and anthropogenic influences. *J Geophys Res* 2007;112:F01011. <http://dx.doi.org/10.1029/2006JF000493>.
